# Supplementary material for: Interspecific Signaling Between the Parasitic Plant and the Host Plants Regulate Xylem Vessel Cell Differentiation in Haustoria of Cuscuta campestris
Source: Front Plant Sci. 2020 Mar 13;11:193. doi: 10.3389/fpls.2020.00193 (PMC7082356; doi:10.3389/fpls.2020.00193)
Supplement: Supplementary file 1 [file DataSheet_1.xlsx]

## Sheet: シート1
	Supplementary Data 1. List of genes up-regulated at 57 hai (+/-) compared with 0 hai (-/-)
id	annotation
Cc000006	Secondary metabolism.phenolics.flavonoid synthesis and modification.flavons and flavonols.flavone synthase activities.type-I flavone synthase
Cc000012	Solute transport.carrier-mediated transport.DMT superfamily.UmamiT-type solute transporter
Cc000013	hypothetical protein
Cc000014	hypothetical protein
Cc000016	Solute transport.carrier-mediated transport.DMT superfamily.UmamiT-type solute transporter
Cc000017	hypothetical protein
Cc000027	hypothetical protein
Cc000028	RNA biosynthesis.transcription factor families.WRKY transcription factor
Cc000034	Chromatin assembly and remodeling.histone modifications.histone lysine methylation/demethylation.JmjC group histone demethylase activities.KDM3-type histone demethylase
Cc000035	hypothetical protein
Cc000037	Cell wall.pectin.homogalacturonan.modification and degradation.pectin methylesterase
Cc000039	Cell wall.pectin.homogalacturonan.modification and degradation.pectin methylesterase
Cc000048	RNA biosynthesis.transcription factor families.WRKY transcription factor
Cc000050	hypothetical protein
Cc000056	hypothetical protein
Cc000057	Protein modification.phosphorylation.TKL kinase superfamily.G-Lectin kinase families.SD-2 kinase
Cc000076	hypothetical protein
Cc000077	hypothetical protein
Cc000094	hypothetical protein
Cc000097	hypothetical protein
Cc000099	Protein modification.phosphorylation.TKL kinase superfamily.LRR-X kinase families.LRR-Xb kinase
Cc000107	Protein modification.phosphorylation.TKL kinase superfamily.LRR-XI kinase
Cc000109	hypothetical protein
Cc000112	Protein modification.phosphorylation.TKL kinase superfamily.LRR-XI kinase
Cc000113	Cytoskeleton.cytoskeleton-nucleoskeleton linking.nuclear lamina.CRWN lamin-like protein
Cc000114	RNA biosynthesis.transcription factor families.AP2/ERF superfamily.AP2-type transcription factor
Cc000116	hypothetical protein
Cc000117	hypothetical protein
Cc000119	hypothetical protein
Cc000120	Cell wall.hemicellulose.heteromannan.synthesis.galactoglucomannan galactosyltransferase (MUCI10)
Cc000125	hypothetical protein
Cc000126	Amino acid metabolism.biosynthesis.glutamate family.glutamate-derived amino acids.ornithine.N-acetylglutamate synthase
Cc000129	hypothetical protein
Cc000132	hypothetical protein
Cc000133	hypothetical protein
Cc000135	Protein modification.hydroxylation.prolyl hydroxylase
Cc000137	Protein degradation.peptidase families.serine-type peptidase activities.subtilisin-type protease families.SBT1 protease
Cc000150	hypothetical protein
Cc000152	RNA biosynthesis.transcription factor families.WRKY transcription factor
Cc000158	hypothetical protein
Cc000163	RNA biosynthesis.transcription factor families.HSF (heat shock) transcription factor
Cc000164	hypothetical protein
Cc000166	Protein biosynthesis.aminoacyl-tRNA synthetase activities.valine-tRNA ligase
Cc000175	hypothetical protein
Cc000188	hypothetical protein
Cc000189	hypothetical protein
Cc000192	hypothetical protein
Cc000193	hypothetical protein
Cc000197	hypothetical protein
Cc000201	Chromatin assembly and remodeling.histone modifications.histone acetylation.CBP/p300 histone acetyltransferase
Cc000205	hypothetical protein
Cc000209	hypothetical protein
Cc000219	hypothetical protein
Cc000224	Polyamine metabolism.spermidine/spermine.synthesis.S-adenosyl methionine decarboxylase
Cc000230	Solute transport.carrier-mediated transport.APC superfamily.AAAP family.AAAP-type transporter
Cc000232	hypothetical protein
Cc000242	hypothetical protein
Cc000243	Phytohormones.brassinosteroid.synthesis.6-deoxocastasterone 6-oxidase
Cc000244	hypothetical protein
Cc000245	Cell wall.cellulose.synthesis.cellulose microfibrils and hemicellulose interaction.COB-type protein
Cc000250	Protein modification.dephosphorylation.aspartate-based protein phosphatase superfamily.FCP phosphatase families.subcluster I phosphatase
Cc000251	Cell cycle.cytokinesis.preprophase microtubule organization.TON1-TRM-PP2A (TTP) preprophase band formation complex.TRM component
Cc000252	Protein modification.phosphorylation.TKL kinase superfamily.LRR-XV kinase
Cc000255	Carbohydrate metabolism.starch metabolism.degradation.hydrolysis and phosphorolysis.amylase activities.alpha amylase
Cc000268	Protein degradation.peptide tagging.Membrane-anchored-Ubiquitin (MUB)-anchor addition.MUB ubiquitin-fold protein
Cc000278	RNA biosynthesis.transcription factor families.WRKY transcription factor
Cc000280	Solute transport.channel-mediated transport.channels.OSCA calcium-permeable channel
Cc000282	Membrane vesicle trafficking.Coat protein I (COPI) coatomer machinery.trafficking regulation.p24-delta regulator protein
Cc000283	Solute transport.carrier-mediated transport.IT superfamily.phosphate transporter (PHO-type)
Cc000287	hypothetical protein
Cc000288	RNA biosynthesis.transcription factor families.NAC transcription factor
Cc000300	hypothetical protein
Cc000301	hypothetical protein
Cc000312	hypothetical protein
Cc000334	hypothetical protein
Cc000343	Protein modification.phosphorylation.TKL kinase superfamily.DUF26 kinase
Cc000348	Lipid metabolism.lipid bodies-associated activities.oleosin
Cc000352	hypothetical protein
Cc000356	hypothetical protein
Cc000369	hypothetical protein
Cc000370	Cellular respiration.tricarboxylic acid cycle.succinate dehydrogenase complex.SDH2-type iron-sulphur component
Cc000371	Cell wall.cell wall proteins.hydroxyproline-rich glycoproteins.extensins (EXTs).glycosylation.EXT serine O-alpha-galactosyltransferase
Cc000376	hypothetical protein
Cc000379	RNA biosynthesis.transcription factor families.NAC transcription factor
Cc000383	Protein modification.phosphorylation.TKL kinase superfamily.CrlRLK1 kinase
Cc000386	Membrane vesicle trafficking.Coat protein I (COPI) coatomer machinery.ARF-GTPase-activating (ARF-GAP) activities.class II ARF-GAP protein
Cc000387	hypothetical protein
Cc000394	Solute transport.channel-mediated transport.channels.VIC superfamily.cyclic nucleotide-gated cation channel (CNGC-type)
Cc000400	hypothetical protein
Cc000401	Protein modification.phosphorylation.TKL kinase superfamily.RLCK-VII kinase families.RLCK-VIIa kinase
Cc000405	Cell wall.cellulose.synthesis.cellulose microfibrils and hemicellulose interaction.COB-type protein
Cc000408	Protein degradation.peptide tagging.Ubiquitin (UBQ)-anchor addition (ubiquitylation).UBQ ubiquitin-fold protein
Cc000415	RNA biosynthesis.transcription factor families.GRAS transcription factor
Cc000418	hypothetical protein
Cc000419	hypothetical protein
Cc000420	hypothetical protein
Cc000426	hypothetical protein
Cc000429	hypothetical protein
Cc000432	hypothetical protein
Cc000435	Protein modification.phosphorylation.CAMK kinase superfamily.CDPK kinase
Cc000440	hypothetical protein
Cc000441	hypothetical protein
Cc000446	Protein degradation.peptide tagging.Small-Ubiquitin-like-Modifier (SUMO)-anchor modification (sumoylation).SUMO ubiquitin-fold protein
Cc000448	hypothetical protein
Cc000449	hypothetical protein
Cc000455	hypothetical protein
Cc000456	Cytoskeleton.microfilament network.actin polymerisation.fimbrin actin-crosslinking factor
Cc000457	hypothetical protein
Cc000458	Protein modification.N-linked glycosylation.complex N-glycan maturation.beta-1,2-xylosyltransferase
Cc000464	Protein modification.phosphorylation.STE kinase superfamily.MAP3K-WNK kinase
Cc000466	hypothetical protein
Cc000475	hypothetical protein
Cc000481	hypothetical protein
Cc000492	hypothetical protein
Cc000499	hypothetical protein
Cc000500	hypothetical protein
Cc000501	hypothetical protein
Cc000502	hypothetical protein
Cc000506	hypothetical protein
Cc000508	RNA biosynthesis.transcription factor families.WRKY transcription factor
Cc000519	hypothetical protein
Cc000523	Nutrient uptake.copper uptake.regulation.KIN17 copper homeostasis co-regulator
Cc000528	hypothetical protein
Cc000530	hypothetical protein
Cc000531	hypothetical protein
Cc000533	hypothetical protein
Cc000540	Protein modification.phosphorylation.TKL kinase superfamily.MAP3K-RAF kinase
Cc000551	Lipid metabolism.lipid transport.phospholipid transverse translocation.ALA-ALIS flippase complex.ALIS regulatory component
Cc000553	Protein translocation.nucleus.nucleocytoplasmic transport.nuclear pore complex (NPC).nuclear basket.NUA nucleoporin
Cc000556	hypothetical protein
Cc000580	RNA biosynthesis.transcription factor families.WRKY transcription factor
Cc000581	hypothetical protein
Cc000582	hypothetical protein
Cc000583	hypothetical protein
Cc000584	hypothetical protein
Cc000592	hypothetical protein
Cc000593	hypothetical protein
Cc000599	hypothetical protein
Cc000601	RNA biosynthesis.transcription factor families.MYB superfamily.MYB-related transcription factor
Cc000604	hypothetical protein
Cc000613	hypothetical protein
Cc000615	hypothetical protein
Cc000616	Protein degradation.peptide tagging.Ubiquitin (UBQ)-anchor addition (ubiquitylation).UBC-conjugating E2 protein
Cc000622	Protein modification.peptide maturation.endomembrane system.SPP signal peptidase
Cc000623	hypothetical protein
Cc000624	Protein modification.phosphorylation.TKL kinase superfamily.RLCK-IX kinase families.RLCK-IXb kinase
Cc000625	hypothetical protein
Cc000626	hypothetical protein
Cc000628	hypothetical protein
Cc000629	Multi-process regulatory mechanisms.Rop GTPase regulatory system.RopGEF guanine nucleotide exchange activities.PRONE-type exchange factor
Cc000632	Phytohormones.jasmonic acid.synthesis.acyl-CoA thioesterase
Cc000649	hypothetical protein
Cc000650	hypothetical protein
Cc000651	RNA biosynthesis.transcription factor families.LIM transcription factor
Cc000654	hypothetical protein
Cc000679	hypothetical protein
Cc000684	hypothetical protein
Cc000685	hypothetical protein
Cc000687	hypothetical protein
Cc000688	Protein degradation.peptide tagging.Related-to-Ubiquitin (RUB/NEDD8)-anchor modification (neddylation).RUB deconjugation of neddylated cullin.COP9 signalosome complex.CSN1 component
Cc000695	hypothetical protein
Cc000699	hypothetical protein
Cc000702	hypothetical protein
Cc000705	hypothetical protein
Cc000706	hypothetical protein
Cc000709	hypothetical protein
Cc000716	Cytoskeleton.actin and tubulin folding.post-CCT Tubulin folding pathway.TFC tubulin folding cofactors.TFC-D cofactor
Cc000721	Cell wall.pectin.homogalacturonan.modification and degradation.pectin methylesterase
Cc000732	hypothetical protein
Cc000733	hypothetical protein
Cc000734	hypothetical protein
Cc000735	hypothetical protein
Cc000736	hypothetical protein
Cc000737	hypothetical protein
Cc000739	RNA biosynthesis.RNA polymerase II-dependent transcription.pre-initiation complex.TFIId basal transcription regulation complex.TAF7 component
Cc000742	hypothetical protein
Cc000744	hypothetical protein
Cc000751	hypothetical protein
Cc000752	hypothetical protein
Cc000762	RNA biosynthesis.transcription factor families.HB (Homeobox) superfamily.HD-ZIP I/II transcription factor
Cc000763	Solute transport.carrier-mediated transport.APC superfamily.APC family.cationic amino acid transporter (CAT-type)
Cc000769	hypothetical protein
Cc000790	Cellular respiration.tricarboxylic acid cycle.mitochondrial NAD-dependent malic enzyme
Cc000791	Membrane vesicle trafficking.clathrin coated vesicle (CCV) machinery.CCV plasma membrane detachment.DRP1-type dynamin
Cc000795	Cell wall.cutin and suberin.cuticular lipid formation.alkane-forming pathway.CER1-CER3 alkane-forming complex.CER1 aldehyde decarbonylase component
Cc000803	hypothetical protein
Cc000804	Solute transport.carrier-mediated transport.MFS superfamily.NRT1/PTR anion transporter
Cc000805	hypothetical protein
Cc000809	hypothetical protein
Cc000810	hypothetical protein
Cc000814	hypothetical protein
Cc000820	hypothetical protein
Cc000823	RNA biosynthesis.transcription factor families.bHLH transcription factor
Cc000829	hypothetical protein
Cc000832	hypothetical protein
Cc000834	Chromatin assembly and remodeling.histone modifications.histone ubiquitination.PRC1 histone mono-ubiquitination complex.Pc-type LHP1 modification reader component
Cc000836	hypothetical protein
Cc000837	Protein modification.N-linked glycosylation.paucimannosidic N-glycan formation.HEXO beta-N-acetylhexosaminidase
Cc000839	hypothetical protein
Cc000840	hypothetical protein
Cc000844	hypothetical protein
Cc000846	hypothetical protein
Cc000847	hypothetical protein
Cc000849	hypothetical protein
Cc000852	Cellular respiration.tricarboxylic acid cycle.citrate synthase
Cc000855	hypothetical protein
Cc000856	Cell wall.callose.callose synthase
Cc000857	RNA biosynthesis.transcription factor families.HB (Homeobox) superfamily.HD-ZIP I/II transcription factor
Cc000870	hypothetical protein
Cc000873	hypothetical protein
Cc000877	hypothetical protein
Cc000882	hypothetical protein
Cc000897	hypothetical protein
Cc000898	hypothetical protein
Cc000899	hypothetical protein
Cc000901	hypothetical protein
Cc000905	Solute transport.carrier-mediated transport.ZIP family.metal cation transporter (ZIP13-type)
Cc000913	Solute transport.carrier-mediated transport.OPT family.oligopeptide transporter (OPT-type)
Cc000916	hypothetical protein
Cc000921	hypothetical protein
Cc000935	hypothetical protein
Cc000937	hypothetical protein
Cc000939	hypothetical protein
Cc000968	hypothetical protein
Cc000972	hypothetical protein
Cc000973	hypothetical protein
Cc000974	hypothetical protein
Cc000985	hypothetical protein
Cc000993	hypothetical protein
Cc000997	hypothetical protein
Cc000998	RNA biosynthesis.transcription factor families.OFP transcription factor
Cc000999	Protein modification.phosphorylation.STE kinase superfamily.MAP3K-WNK kinase
Cc001013	RNA biosynthesis.transcription factor families.C2C2 superfamily.GATA transcription factor
Cc001021	Protein degradation.peptide tagging.Membrane-anchored-Ubiquitin (MUB)-anchor addition.UBC-subclass-6 conjugation E2 protein
Cc001027	hypothetical protein
Cc001028	Cell wall.pectin.modification and degradation.pectin acetylesterase
Cc001054	hypothetical protein
Cc001057	Environmental stimuli response.temperature.Hsp (heat-shock-responsive protein) families.Hsp70 family.DnaK protein
Cc001062	hypothetical protein
Cc001064	hypothetical protein
Cc001065	hypothetical protein
Cc001066	hypothetical protein
Cc001072	Chromatin assembly and remodeling.histones.H2B-type histone
Cc001077	RNA biosynthesis.transcription factor families.C2H2 zinc finger transcription factor
Cc001082	hypothetical protein
Cc001084	hypothetical protein
Cc001086	hypothetical protein
Cc001117	RNA biosynthesis.transcription factor families.C2C2 superfamily.DOF transcription factor
Cc001122	hypothetical protein
Cc001125	hypothetical protein
Cc001136	Solute transport.carrier-mediated transport.DMT superfamily.NST-TPT group.UTR1/5 nucleotide sugar transporter
Cc001137	hypothetical protein
Cc001142	hypothetical protein
Cc001144	RNA biosynthesis.transcription factor families.C2H2 zinc finger transcription factor
Cc001145	hypothetical protein
Cc001148	RNA biosynthesis.transcription factor families.C2H2 zinc finger transcription factor
Cc001151	Chromatin assembly and remodeling.histones.H2B-type histone
Cc001156	Solute transport.channel-mediated transport.channels.VIC superfamily.voltage-gated potassium cation channel (AKT/SKOR/GORK-type)
Cc001160	hypothetical protein
Cc001164	hypothetical protein
Cc001165	Environmental stimuli response.temperature.Hsp (heat-shock-responsive protein) families.Hsp70 family.DnaK protein
Cc001169	hypothetical protein
Cc001170	hypothetical protein
Cc001175	hypothetical protein
Cc001181	Solute transport.carrier-mediated transport.MFS superfamily.PHT1 phosphate transporter
Cc001183	hypothetical protein
Cc001186	hypothetical protein
Cc001187	RNA biosynthesis.transcription factor families.MYB superfamily.MYB-related transcription factor
Cc001188	hypothetical protein
Cc001199	hypothetical protein
Cc001208	hypothetical protein
Cc001211	hypothetical protein
Cc001213	hypothetical protein
Cc001242	hypothetical protein
Cc001256	hypothetical protein
Cc001257	Protein modification.dephosphorylation.serine/threonine protein phosphatase superfamily.PPM/PP2C Mn/Mg-dependent phosphatase families.clade A phosphatase
Cc001264	hypothetical protein
Cc001271	Coenzyme metabolism.tetrahydrofolate synthesis.folyl-polyglutamate synthetase
Cc001272	hypothetical protein
Cc001280	hypothetical protein
Cc001289	hypothetical protein
Cc001290	Secondary metabolism.nitrogen-containing secondary compounds.alkaloids.indole alkaloid synthesis.aromatic L-amino acid decarboxylase
Cc001297	hypothetical protein
Cc001300	hypothetical protein
Cc001311	Protein modification.phosphorylation.TKL kinase superfamily.Crinkly-like kinase
Cc001313	Protein modification.phosphorylation.CMGC kinase superfamily.DYRK kinase
Cc001314	RNA biosynthesis.transcription factor families.C3H zinc finger transcription factor
Cc001316	hypothetical protein
Cc001319	hypothetical protein
Cc001320	hypothetical protein
Cc001332	RNA biosynthesis.transcription factor families.AP2/ERF superfamily.DREB-type transcription factor
Cc001339	hypothetical protein
Cc001341	hypothetical protein
Cc001342	hypothetical protein
Cc001344	hypothetical protein
Cc001348	Redox homeostasis.enzymatic reactive oxygen species scavengers.superoxide dismutase activities.manganese superoxide dismutase
Cc001350	hypothetical protein
Cc001353	hypothetical protein
Cc001355	Phytohormones.cytokinin.perception and signal transduction.A-type ARR response negative regulator
Cc001372	hypothetical protein
Cc001373	hypothetical protein
Cc001374	RNA biosynthesis.transcription factor families.AP2/ERF superfamily.ERF-type transcription factor
Cc001375	hypothetical protein
Cc001376	hypothetical protein
Cc001377	Lipid metabolism.sphingolipid metabolism.ceramide kinase
Cc001378	hypothetical protein
Cc001379	hypothetical protein
Cc001384	Protein modification.phosphorylation.TKL kinase superfamily.LRR-XI kinase
Cc001388	hypothetical protein
Cc001389	Protein degradation.peptide tagging.Ubiquitin (UBQ)-anchor addition (ubiquitylation).UBQ-ligase E3 activities.RING-domain E3 ligase activities.RING-H2-type E3 ligase
Cc001390	hypothetical protein
Cc001394	hypothetical protein
Cc001402	hypothetical protein
Cc001409	hypothetical protein
Cc001410	Carbohydrate metabolism.sorbitol metabolism.sorbitol dehydrogenase
Cc001419	Solute transport.carrier-mediated transport.MOP superfamily.MATE family.metabolite transporter (DTX-type)
Cc001422	hypothetical protein
Cc001423	hypothetical protein
Cc001428	Protein degradation.peptide tagging.Ubiquitin (UBQ)-anchor addition (ubiquitylation).UBQ-ligase E3 activities.RING-domain E3 ligase activities.RING-HCa-type E3 ligase
Cc001436	hypothetical protein
Cc001440	hypothetical protein
Cc001443	hypothetical protein
Cc001444	hypothetical protein
Cc001445	Protein modification.peptide maturation.endomembrane system.SPP signal peptidase
Cc001447	hypothetical protein
Cc001453	RNA biosynthesis.transcription factor families.GRAS transcription factor
Cc001454	hypothetical protein
Cc001456	hypothetical protein
Cc001458	Environmental stimuli response.systemic acquired resistance (SAR).pipecolic acid biosynthesis.SARD4 cyclodeaminase
Cc001461	Solute transport.channel-mediated transport.channels.SLAC anion channel
Cc001479	Solute transport.carrier-mediated transport.TOC superfamily.SWEET sugar efflux transporter
Cc001486	Phytohormones.abscisic acid.perception and signaling.PYR/PYL-receptor.cytoplasm-localized receptor complex.PYL/RCAR-type regulatory component
Cc001490	hypothetical protein
Cc001491	hypothetical protein
Cc001497	hypothetical protein
Cc001506	hypothetical protein
Cc001509	hypothetical protein
Cc001510	hypothetical protein
Cc001515	hypothetical protein
Cc001517	hypothetical protein
Cc001519	hypothetical protein
Cc001520	hypothetical protein
Cc001521	hypothetical protein
Cc001523	Cytoskeleton.microfilament network.myosin microfilament-based motor protein activities.MyoB myosin receptor
Cc001526	hypothetical protein
Cc001535	hypothetical protein
Cc001536	Protein degradation.peptidase families.aspartic-type peptidase activities.pepsin-type protease
Cc001538	hypothetical protein
Cc001539	hypothetical protein
Cc001540	hypothetical protein
Cc001541	Protein degradation.peptide tagging.Ubiquitin (UBQ)-anchor addition (ubiquitylation).UBQ-ligase E3 activities.U-Box E3 ligase activities.PUB-type
Cc001543	hypothetical protein
Cc001545	hypothetical protein
Cc001548	Protein modification.disulfide bond formation.apoplast.atypical quiescin sulfhydryl oxidase (QSOX)
Cc001549	hypothetical protein
Cc001550	hypothetical protein
Cc001551	Membrane vesicle trafficking.endomembrane trafficking.protein recycling.deubiquitination.BRO1 deubiquitinase recruiting protein
Cc001552	hypothetical protein
Cc001569	Lipid metabolism.glycerolipid synthesis.phosphatidylserine.base-exchange pathway.base-exchange-type phosphatidylserine synthase
Cc001576	hypothetical protein
Cc001581	Protein modification.phosphorylation.TKL kinase superfamily.LRK10-1-like kinase
Cc001582	Protein modification.dephosphorylation.serine/threonine protein phosphatase superfamily.PPM/PP2C Mn/Mg-dependent phosphatase families.clade H phosphatase
Cc001584	hypothetical protein
Cc001585	hypothetical protein
Cc001587	hypothetical protein
Cc001589	RNA biosynthesis.transcription factor families.bHLH transcription factor
Cc001590	Phytohormones.cytokinin.synthesis.adenylate isopentenyltransferase
Cc001595	RNA biosynthesis.transcription factor families.AP2/ERF superfamily.ERF-type transcription factor
Cc001601	Lipid metabolism.sphingolipid metabolism.sphingosine transfer protein
Cc001602	hypothetical protein
Cc001605	hypothetical protein
Cc001611	hypothetical protein
Cc001613	Phytohormones.brassinosteroid.perception and signal transduction.receptor complex.SERK-type co-receptor kinase (BAK)
Cc001615	Cell wall.cell wall proteins.hydroxyproline-rich glycoproteins.arabinogalactan proteins (AGPs).glycoproteins.xylogen-type arabinogalactan protein
Cc001618	hypothetical protein
Cc001621	hypothetical protein
Cc001622	RNA biosynthesis.transcription factor families.CAMTA transcription factor
Cc001624	hypothetical protein
Cc001642	Secondary metabolism.nitrogen-containing secondary compounds.glucosinolates.glucosinolate synthesis.gamma-glutamyl peptidase
Cc001644	hypothetical protein
Cc001645	Solute transport.channel-mediated transport.channels.CorA family.CorA metal cation transporter
Cc001647	hypothetical protein
Cc001649	Coenzyme metabolism.tetrapyrrol biosynthesis.5-aminolevulinic acid formation.glutamyl-tRNA reductase
Cc001655	hypothetical protein
Cc001659	RNA biosynthesis.transcription factor families.MYB superfamily.MYB-related transcription factor
Cc001660	hypothetical protein
Cc001661	DNA damage response.DNA repair polymerase activities.DNA polymerase kappa (POLK)
Cc001664	hypothetical protein
Cc001665	hypothetical protein
Cc001668	RNA biosynthesis.transcription factor families.C2H2 zinc finger transcription factor
Cc001674	Protein modification.dephosphorylation.serine/threonine protein phosphatase superfamily.PPM/PP2C Mn/Mg-dependent phosphatase families.clade D phosphatase
Cc001676	Phytohormones.auxin.conjugation and degradation.indole-3-acetic acid-amido synthetase
Cc001680	Cell wall.hemicellulose.xyloglucan.modification and degradation.1,2-alpha-fucosidase
Cc001688	hypothetical protein
Cc001689	Secondary metabolism.phenolics.flavonoid synthesis and modification.flavonoid glycosylation.flavonol 3-O-glycosyltransferase
Cc001690	hypothetical protein
Cc001691	Secondary metabolism.phenolics.flavonoid synthesis and modification.flavonoid glycosylation.flavonol 3-O-glycosyltransferase
Cc001692	Secondary metabolism.phenolics.flavonoid synthesis and modification.flavonoid glycosylation.flavonol 3-O-glycosyltransferase
Cc001693	hypothetical protein
Cc001697	Protein degradation.peptide tagging.Ubiquitin (UBQ)-anchor addition (ubiquitylation).UBQ-ligase E3 activities.RING-domain E3 ligase activities.RING-H2-type E3 ligase
Cc001699	hypothetical protein
Cc001702	Nutrient uptake.nitrogen assimilation.nitrate assimilation.nitrite reductase
Cc001703	RNA biosynthesis.transcription factor families.AP2/ERF superfamily.ERF-type transcription factor
Cc001704	hypothetical protein
Cc001711	hypothetical protein
Cc001712	hypothetical protein
Cc001714	Protein modification.phosphorylation.CAMK kinase superfamily.CRK kinase
Cc001717	RNA biosynthesis.transcription factor families.MYB superfamily.G2-like GARP transcription factor
Cc001725	Protein modification.phosphorylation.atypical kinase families.PIKK kinase
Cc001726	hypothetical protein
Cc001729	hypothetical protein
Cc001730	hypothetical protein
Cc001732	Cytoskeleton.cytoskeleton-plasma membrane-cell wall interface.AT14a integrin-like protein
Cc001734	Solute transport.carrier-mediated transport.MFS superfamily.SP family.polyol/monosaccharide transporter (PLT-type)
Cc001741	hypothetical protein
Cc001748	hypothetical protein
Cc001753	hypothetical protein
Cc001754	hypothetical protein
Cc001757	Protein degradation.peptide tagging.Small-Ubiquitin-like-Modifier (SUMO)-anchor modification (sumoylation).SUMO activating E1 complex.large component (SAE2)
Cc001760	RNA biosynthesis.transcription factor families.SRS transcription factor
Cc001761	Cytoskeleton.microtubular network.Kinesin microtubule-based motor protein activities.Kinesin-7 motor protein
Cc001766	hypothetical protein
Cc001773	RNA biosynthesis.transcription factor families.BBR/BPC transcription factor
Cc001790	hypothetical protein
Cc001798	hypothetical protein
Cc001801	Protein degradation.peptide tagging.Ubiquitin (UBQ)-anchor addition (ubiquitylation).UBQ-ligase E3 activities.HECT E3 monomeric ligase
Cc001811	hypothetical protein
Cc001812	hypothetical protein
Cc001814	Solute transport.carrier-mediated transport.MFS superfamily.DHA-1 family.putative metal cation transporter (TCR-type)
Cc001817	Solute transport.carrier-mediated transport.APC superfamily.AAAP family.amino acid transporter (LHT-type)
Cc001818	Solute transport.carrier-mediated transport.MFS superfamily.DHA-1 family.putative metal cation transporter (TCR-type)
Cc001819	hypothetical protein
Cc001822	Solute transport.carrier-mediated transport.APC superfamily.AAAP family.amino acid transporter (LHT-type)
Cc001825	Cell wall.cell wall proteins.expansins.alpha-like-type expansin
Cc001830	Protein modification.phosphorylation.TKL kinase superfamily.RLCK-VII kinase families.RLCK-VIIa kinase
Cc001838	RNA biosynthesis.transcription factor families.C2C2 superfamily.DOF transcription factor
Cc001839	hypothetical protein
Cc001842	Protein modification.phosphorylation.STE kinase superfamily.MAP3K-WNK kinase
Cc001852	hypothetical protein
Cc001853	Amino acid metabolism.biosynthesis.aspartate family.aspartate-derived amino acids.isoleucine.methionine gamma-lyase
Cc001854	Lipid metabolism.lipid degradation.triacylglycerol lipase activities.diacyl-/triacylglycerol lipase activities.LIP-type triacylglycerol lipase
Cc001870	hypothetical protein
Cc001872	hypothetical protein
Cc001877	hypothetical protein
Cc001878	hypothetical protein
Cc001890	hypothetical protein
Cc001892	Protein modification.phosphorylation.TKL kinase superfamily.LRR-VIII kinase families.LRR-VIII-2 kinase
Cc001903	hypothetical protein
Cc001904	hypothetical protein
Cc001912	RNA biosynthesis.transcription factor families.WRKY transcription factor
Cc001940	Solute transport.carrier-mediated transport.APC superfamily.AAAP family.amino acid transporter (AAP-type)
Cc001945	hypothetical protein
Cc001952	Phytohormones.gibberellin.conjugation and degradation.gibberellin 2-oxidase
Cc001953	hypothetical protein
Cc001960	hypothetical protein
Cc001962	hypothetical protein
Cc001973	hypothetical protein
Cc001975	Protein modification.phosphorylation.TKL kinase superfamily.RLCK-XIII kinase
Cc001978	Protein modification.phosphorylation.TKL kinase superfamily.LRR-VIII kinase families.LRR-VIII-2 kinase
Cc001982	hypothetical protein
Cc001996	hypothetical protein
Cc002032	DNA damage response.BRCA1窶釘ARD1 DNA-damage response heterodimer.BRCA1|BARD1 component
Cc002035	Protein modification.phosphorylation.TKL kinase superfamily.RLCK-VIII kinase families.RLCK-VIII kinase
Cc002040	hypothetical protein
Cc002041	Protein modification.phosphorylation.TKL kinase superfamily.PERK kinase
Cc002044	hypothetical protein
Cc002045	Lipid metabolism.fatty acid synthesis.fatty acid chain termination.palmitoyl-ACP thioesterase
Cc002052	hypothetical protein
Cc002053	Nutrient uptake.nitrogen assimilation.glutamate deamination.glutamate dehydrogenase
Cc002058	hypothetical protein
Cc002067	hypothetical protein
Cc002069	Solute transport.channel-mediated transport.channels.QUAC/ALMT anion channel
Cc002074	hypothetical protein
Cc002075	hypothetical protein
Cc002076	hypothetical protein
Cc002077	Amino acid metabolism.biosynthesis.shikimate family.phenylalanine and tyrosine.chorismate mutase
Cc002079	hypothetical protein
Cc002085	hypothetical protein
Cc002086	Solute transport.carrier-mediated transport.CPA superfamily.CPA-1 family.proton:lithium/sodium cation antiporter (SOS1-type)
Cc002091	Solute transport.primary active transport.ABC superfamily.ABC1 family.subfamily ABCC transporter
Cc002093	Cell cycle.mitosis and meiosis.metaphase to anaphase transition.Anaphase-Promoting Complex/Cyclosome (APC/C)-dependent ubiquitination.APC/C E3 ubiquitin ligase complex.catalytic core subcomplex.APC10 component
Cc002094	hypothetical protein
Cc002109	hypothetical protein
Cc002110	hypothetical protein
Cc002125	hypothetical protein
Cc002132	Coenzyme metabolism.iron-sulfur cluster assembly machineries.cytosolic CIA system.transfer phase.CIA1 component
Cc002137	RNA biosynthesis.RNA polymerase II-dependent transcription.pre-initiation complex.TFIId basal transcription regulation complex.TAF12 component
Cc002160	Protein degradation.peptide tagging.Ubiquitin (UBQ)-anchor addition (ubiquitylation).UBQ-ligase E3 activities.HECT E3 monomeric ligase
Cc002161	Solute transport.carrier-mediated transport.TOC superfamily.TSUP transport protein
Cc002166	Cell wall.pectin.homogalacturonan.modification and degradation.pectin methylesterase
Cc002173	Cell cycle.regulation.cyclin-dependent kinase inhibitor activities.KRP/ICK-type inhibitor
Cc002175	DNA damage response.DNA repair mechanisms.homologous recombination repair (HR).MDC1-like repair factor
Cc002182	hypothetical protein
Cc002183	hypothetical protein
Cc002186	Secondary metabolism.terpenoids.methylerythritol phosphate pathway.DXS 1-deoxy-D-xylulose 5-phosphate synthase
Cc002188	hypothetical protein
Cc002193	Membrane vesicle trafficking.endomembrane trafficking.protein recycling.AP-5 cargo adaptor complex.AP5M medium mu subunit
Cc002195	hypothetical protein
Cc002206	Protein degradation.peptidase families.aspartic-type peptidase activities.pepsin-type protease
Cc002207	RNA biosynthesis.transcription factor families.NF-Y transcription factor complex.NF-YC component
Cc002216	hypothetical protein
Cc002219	hypothetical protein
Cc002220	hypothetical protein
Cc002223	Cell wall.cell wall proteins.hydroxyproline-rich glycoproteins.arabinogalactan proteins (AGPs).glycoproteins.xylogen-type arabinogalactan protein
Cc002224	hypothetical protein
Cc002230	Phytohormones.abscisic acid.perception and signaling.signal transducer (AIP2)
Cc002241	Protein modification.phosphorylation.TKL kinase superfamily.MLK kinase families.MLK-II kinase
Cc002243	hypothetical protein
Cc002246	hypothetical protein
Cc002253	hypothetical protein
Cc002256	Cell wall.cellulose.synthesis.cellulose synthase complex (CSC).CSC-interacting proteins.KOR-type endo-1,4-beta-glucanase
Cc002260	hypothetical protein
Cc002268	RNA biosynthesis.transcription factor families.NAC transcription factor
Cc002278	hypothetical protein
Cc002281	hypothetical protein
Cc002284	Protein degradation.peptide tagging.Ubiquitin (UBQ)-anchor addition (ubiquitylation).UBQ-ligase E3 activities.RING-domain E3 ligase activities.RING-HCa-type E3 ligase
Cc002286	hypothetical protein
Cc002289	hypothetical protein
Cc002290	hypothetical protein
Cc002297	hypothetical protein
Cc002304	hypothetical protein
Cc002314	Photosynthesis.CAM/C4 photosynthesis.phosphoenolpyruvate (PEP) carboxylase activity.regulation.PEP carboxylase kinase
Cc002322	hypothetical protein
Cc002330	Chromatin assembly and remodeling.histone modifications.histone lysine methylation/demethylation.JmjC group histone demethylase activities.PKDM7-type histone demethylase
Cc002332	hypothetical protein
Cc002341	Carbohydrate metabolism.trehalose metabolism.trehalose-6-phosphate phosphatase
Cc002342	Solute transport.primary active transport.ABC superfamily.ABC2 family.subfamily ABCG transporter
Cc002343	Solute transport.primary active transport.ABC superfamily.ABC2 family.subfamily ABCG transporter
Cc002344	Solute transport.primary active transport.ABC superfamily.ABC2 family.subfamily ABCG transporter
Cc002346	Protein modification.phosphorylation.TKL kinase superfamily.CrlRLK1 kinase
Cc002347	hypothetical protein
Cc002353	hypothetical protein
Cc002355	hypothetical protein
Cc002359	hypothetical protein
Cc002360	Solute transport.channel-mediated transport.channels.MIP family.tonoplast intrinsic protein (TIP-type)
Cc002362	hypothetical protein
Cc002365	hypothetical protein
Cc002370	hypothetical protein
Cc002371	Cell wall.nucleotide sugars.sugar nucleotide oxidation pathway (SNOP).UDP-D-glucuronic acid decarboxylase
Cc002379	hypothetical protein
Cc002383	Protein modification.phosphorylation.TKL kinase superfamily.RLCK-VII kinase families.RLCK-VIIa kinase
Cc002384	Protein degradation.26S proteasome.regulation.PTRE1 regulator
Cc002392	Cell wall.cell wall proteins.expansins.alpha-type expansin
Cc002393	RNA biosynthesis.transcription factor families.GRAS transcription factor
Cc002394	RNA biosynthesis.transcription factor families.GRAS transcription factor
Cc002395	Cell cycle.regulation.cyclin-dependent kinase inhibitor activities.SIM-type inhibitor
Cc002397	Protein degradation.peptidase families.aspartic-type peptidase activities.pepsin-type protease
Cc002400	hypothetical protein
Cc002402	hypothetical protein
Cc002406	Protein modification.dephosphorylation.serine/threonine protein phosphatase superfamily.PPM/PP2C Mn/Mg-dependent phosphatase families.clade A phosphatase
Cc002408	Protein modification.phosphorylation.TKL kinase superfamily.WAK/WAKL kinase
Cc002410	Amino acid metabolism.biosynthesis.glutamate family.glutamate-derived amino acids.proline.main pathway.pyrroline-5-carboxylate synthetase
Cc002412	hypothetical protein
Cc002413	Solute transport.carrier-mediated transport.MFS superfamily.NRT1/PTR anion transporter
Cc002415	hypothetical protein
Cc002416	hypothetical protein
Cc002418	hypothetical protein
Cc002419	hypothetical protein
Cc002424	hypothetical protein
Cc002425	Protein degradation.peptide tagging.Ubiquitin (UBQ)-anchor addition (ubiquitylation).UBQ-ligase E3 activities.RING-domain E3 ligase activities.RING-H2-type E3 ligase
Cc002427	hypothetical protein
Cc002432	hypothetical protein
Cc002434	Lipid metabolism.sphingolipid metabolism.inositol phosphorylceramide mannosyltransferase
Cc002438	hypothetical protein
Cc002440	Protein degradation.N-end rule pathway of targeted proteolysis.N-terminal modification.arginyl-tRNA-protein transferase (ATE)
Cc002441	hypothetical protein
Cc002442	hypothetical protein
Cc002443	hypothetical protein
Cc002449	Lipid metabolism.fatty acid synthesis.fatty acid desaturation and elongation.omega-3/omega-6 fatty acid desaturase
Cc002450	Cell wall.hemicellulose.xylan.modification and degradation.xylan O-acetyltransferase
Cc002456	hypothetical protein
Cc002457	hypothetical protein
Cc002464	hypothetical protein
Cc002465	hypothetical protein
Cc002467	Phytohormones.abscisic acid.perception and signaling.PYR/PYL-receptor.cytoplasm-localized receptor complex.PYL/RCAR-type regulatory component
Cc002472	hypothetical protein
Cc002476	hypothetical protein
Cc002477	hypothetical protein
Cc002487	hypothetical protein
Cc002488	hypothetical protein
Cc002491	hypothetical protein
Cc002500	RNA biosynthesis.transcription factor families.WRKY transcription factor
Cc002502	hypothetical protein
Cc002503	Chromatin assembly and remodeling.chromatin remodeling complexes.ATPase core components.SSO1653-like group.SHPRH chromatin remodeling factor
Cc002504	hypothetical protein
Cc002506	Phytohormones.auxin.conjugation and degradation.indole-3-acetic acid carboxyl methyltransferase
Cc002519	hypothetical protein
Cc002527	hypothetical protein
Cc002528	hypothetical protein
Cc002529	Chromatin assembly and remodeling.histone modifications.histone lysine methylation/demethylation.PRC2 histone methylation complex.VRN/FIS/EMF core complexes.SUZ12-like component (EMF2,VRN2,FIS2)
Cc002541	RNA biosynthesis.transcription factor families.AP2/ERF superfamily.ERF-type transcription factor
Cc002542	Lipid metabolism.lipid bodies-associated activities.oleosin
Cc002556	Protein modification.phosphorylation.TKL kinase superfamily.LRR-XI kinase
Cc002564	Cell wall.pectin.homogalacturonan.modification and degradation.pectin methylesterase
Cc002565	Cell wall.pectin.homogalacturonan.modification and degradation.pectin methylesterase
Cc002566	hypothetical protein
Cc002570	hypothetical protein
Cc002575	hypothetical protein
Cc002576	hypothetical protein
Cc002589	hypothetical protein
Cc002594	hypothetical protein
Cc002596	hypothetical protein
Cc002598	Protein modification.phosphorylation.CAMK kinase superfamily.PEPRK kinase
Cc002604	hypothetical protein
Cc002621	Amino acid metabolism.degradation.branched-chain amino acid.isovaleryl-CoA-dehydrogenase
Cc002624	Protein translocation.endoplasmic reticulum.co-translational insertion system.Sec61 subcomplex.beta subunit
Cc002629	hypothetical protein
Cc002632	hypothetical protein
Cc002635	RNA biosynthesis.transcription factor families.HB (Homeobox) superfamily.HD-ZIP III transcription factor
Cc002636	hypothetical protein
Cc002644	hypothetical protein
Cc002651	Protein modification.phosphorylation.CAMK kinase superfamily.SNF1-related SnRK1 kinase complex.beta-type regulatory subunit
Cc002652	hypothetical protein
Cc002662	hypothetical protein
Cc002682	hypothetical protein
Cc002694	RNA biosynthesis.transcription factor families.TIFY transcription factor
Cc002697	hypothetical protein
Cc002723	hypothetical protein
Cc002733	Protein degradation.peptide tagging.Related-to-Ubiquitin (RUB/NEDD8)-anchor modification (neddylation).RUB maturation.DEN1 deneddylase
Cc002734	hypothetical protein
Cc002735	hypothetical protein
Cc002740	hypothetical protein
Cc002743	hypothetical protein
Cc002744	Protein modification.phosphorylation.TKL kinase superfamily.LRR-VIII kinase families.LRR-VIII-2 kinase
Cc002745	Protein degradation.peptide tagging.Ubiquitin (UBQ)-anchor addition (ubiquitylation).UBQ-ligase E3 activities.RING-domain E3 ligase activities.RING-H2-type E3 ligase
Cc002749	hypothetical protein
Cc002750	hypothetical protein
Cc002754	RNA biosynthesis.transcription factor families.WRKY transcription factor
Cc002755	hypothetical protein
Cc002756	hypothetical protein
Cc002759	hypothetical protein
Cc002760	Protein modification.phosphorylation.CAMK kinase superfamily.SNF1-related SnRK3 kinase
Cc002761	hypothetical protein
Cc002764	RNA biosynthesis.transcription factor families.C2C2 superfamily.DOF transcription factor
Cc002765	hypothetical protein
Cc002770	Lipid metabolism.lipid degradation.phospholipase activities.phospholipase A1 activities.PC-PLA1-type phospholipase A1
Cc002772	hypothetical protein
Cc002776	hypothetical protein
Cc002778	RNA biosynthesis.transcription factor families.HB (Homeobox) superfamily.WOX transcription factor
Cc002784	Protein modification.phosphorylation.TKL kinase superfamily.LRR-XI kinase
Cc002785	hypothetical protein
Cc002787	hypothetical protein
Cc002788	hypothetical protein
Cc002793	RNA biosynthesis.transcription factor families.C2C2 superfamily.DOF transcription factor
Cc002795	hypothetical protein
Cc002798	hypothetical protein
Cc002801	hypothetical protein
Cc002802	Nutrient uptake.phosphorus assimilation.phosphate signalling.PHO2 ubiquitin-conjugating E2 protein
Cc002813	hypothetical protein
Cc002814	Chromatin assembly and remodeling.chromatin remodeling complexes.ATPase core components.Rad5/16-like group.Rad5/16 chromatin remodeling factor
Cc002831	hypothetical protein
Cc002832	hypothetical protein
Cc002835	Protein modification.phosphorylation.TKL kinase superfamily.G-Lectin kinase families.SD-1 kinase
Cc002844	hypothetical protein
Cc002850	hypothetical protein
Cc002870	hypothetical protein
Cc002873	RNA biosynthesis.transcription factor families.WRKY transcription factor
Cc002879	RNA biosynthesis.transcription factor families.WRKY transcription factor
Cc002891	hypothetical protein
Cc002892	hypothetical protein
Cc002895	Multi-process regulatory mechanisms.Rop GTPase regulatory system.RopGDI guanine nucleotide dissociation inhibitor
Cc002898	hypothetical protein
Cc002905	hypothetical protein
Cc002912	hypothetical protein
Cc002914	hypothetical protein
Cc002915	Phytohormones.brassinosteroid.perception and signal transduction.GSK3-type protein kinase (BIN2)
Cc002917	hypothetical protein
Cc002927	hypothetical protein
Cc002934	hypothetical protein
Cc002935	hypothetical protein
Cc002946	hypothetical protein
Cc002948	hypothetical protein
Cc002957	hypothetical protein
Cc002962	Protein degradation.peptidase families.serine-type peptidase activities.serine carboxypeptidase
Cc002967	RNA biosynthesis.transcription factor families.NAC transcription factor
Cc002971	hypothetical protein
Cc002972	hypothetical protein
Cc002979	hypothetical protein
Cc002981	hypothetical protein
Cc002982	hypothetical protein
Cc002983	hypothetical protein
Cc002985	hypothetical protein
Cc002986	RNA biosynthesis.transcription factor families.bHLH transcription factor
Cc002992	hypothetical protein
Cc002995	hypothetical protein
Cc003002	Secondary metabolism.nitrogen-containing secondary compounds.glucosinolates.glucosinolate synthesis.gamma-glutamyl peptidase
Cc003009	Solute transport.carrier-mediated transport.MFS superfamily.OATP organic anion transporter
Cc003012	hypothetical protein
Cc003014	hypothetical protein
Cc003016	Protein degradation.peptide tagging.Ubiquitin (UBQ)-anchor addition (ubiquitylation).UBQ-ligase E3 activities.Cullin-based ubiquitylation complexes.SKP1-CUL1-FBX (SCF) E3 ligase complexes.F-BOX substrate adaptor components.FBX component
Cc003021	Solute transport.carrier-mediated transport.APC superfamily.NCS-2 family.unknown metabolite transporter (NAT-type)
Cc003024	RNA biosynthesis.transcription factor families.C2H2 zinc finger transcription factor
Cc003029	Amino acid metabolism.biosynthesis.aspartate family.aspartate-derived amino acids.methionine.salvage pathway.methylthioribose kinase
Cc003030	hypothetical protein
Cc003031	Cell wall.lignin.monolignol synthesis.cinnamyl-alcohol dehydrogenase
Cc003033	RNA biosynthesis.transcription factor families.MYB superfamily.MYB transcription factor
Cc003061	hypothetical protein
Cc003062	Membrane vesicle trafficking.endomembrane trafficking.protein recycling.ubiquitylated cargo adaptors.TOM associated protein
Cc003068	hypothetical protein
Cc003072	hypothetical protein
Cc003078	hypothetical protein
Cc003079	RNA biosynthesis.transcription factor families.HB (Homeobox) superfamily.HD-ZIP III transcription factor
Cc003083	hypothetical protein
Cc003095	hypothetical protein
Cc003096	hypothetical protein
Cc003097	hypothetical protein
Cc003103	RNA biosynthesis.transcription factor families.HB (Homeobox) superfamily.BEL transcription factor
Cc003104	Chromatin assembly and remodeling.histone modifications.histone deacetylation.HDA1/RPD3 histone deacetylase activity.class-III histone deacetylase
Cc003107	Protein modification.phosphorylation.TKL kinase superfamily.MAP3K-RAF kinase
Cc003111	RNA biosynthesis.transcription factor families.AS2/LOB transcription factor
Cc003113	Cell wall.pectin.modification and degradation.pectin lyase
Cc003117	hypothetical protein
Cc003119	RNA processing.RNA splicing.spliceosome-associated non-snRNP MOS4-associated complex (MAC).associated components.ISY1/MAC8 component
Cc003124	hypothetical protein
Cc003130	hypothetical protein
Cc003131	hypothetical protein
Cc003132	hypothetical protein
Cc003133	hypothetical protein
Cc003137	RNA biosynthesis.transcription factor families.NIN-like superfamily.RKD transcription factor
Cc003138	Amino acid metabolism.biosynthesis.aspartate family.asparagine.omega-amidase
Cc003142	hypothetical protein
Cc003152	Solute transport.channel-mediated transport.channels.COPT copper cation channel
Cc003157	Solute transport.primary active transport.P-type ATPase superfamily.P1 family.HMA P1B-type heavy metal cation-transporting ATPase
Cc003171	hypothetical protein
Cc003178	Cytoskeleton.microfilament network.myosin microfilament-based motor protein activities.MadB myosin adaptor protein
Cc003188	DNA damage response.DNA repair polymerase activities.DNA polymerase zeta complex.REV3 catalytic subunit
Cc003189	Protein modification.phosphorylation.TKL kinase superfamily.RLCK-X kinase
Cc003190	hypothetical protein
Cc003198	hypothetical protein
Cc003203	Environmental stimuli response.temperature.Hsp (heat-shock-responsive protein) families.sHsp (small heat-shock-responsive protein) families.class-ER protein
Cc003205	Membrane vesicle trafficking.regulation of membrane tethering and fusion.RAB-GTPase activities.A-class RAB GTPase
Cc003206	hypothetical protein
Cc003216	hypothetical protein
Cc003226	hypothetical protein
Cc003229	Chromatin assembly and remodeling.chromatin remodeling complexes.ATPase core components.Rad54-like group LSH/RAD54.DRD1 chromatin remodeling factor
Cc003249	hypothetical protein
Cc003260	hypothetical protein
Cc003264	hypothetical protein
Cc003269	hypothetical protein
Cc003276	hypothetical protein
Cc003294	Phytohormones.brassinosteroid.perception and signal transduction.receptor complex.receptor kinase (BRI)
Cc003296	RNA biosynthesis.transcription factor families.WRKY transcription factor
Cc003298	hypothetical protein
Cc003299	hypothetical protein
Cc003306	hypothetical protein
Cc003308	hypothetical protein
Cc003316	Chromatin assembly and remodeling.histone modifications.histone deacetylation.SIR2 histone deacetylase
Cc003320	hypothetical protein
Cc003321	Protein modification.phosphorylation.AGC kinase superfamily.AGC-VIII kinase
Cc003349	hypothetical protein
Cc003350	hypothetical protein
Cc003351	hypothetical protein
Cc003356	Cellular respiration.tricarboxylic acid cycle.2-oxoglutarate dehydrogenase complex.E2 component
Cc003357	Membrane vesicle trafficking.autophagosome formation.ATG8/ATG12 conjugation system.ATG8 ubiquitin-fold protein
Cc003358	hypothetical protein
Cc003359	hypothetical protein
Cc003360	Photosynthesis.photophosphorylation.ATP synthase complex.peripheral CF1 subcomplex.subunit gamma
Cc003361	Protein biosynthesis.translation initiation.pre-initiation complex (PIC).eIF1 PIC assembly factor
Cc003365	hypothetical protein
Cc003373	hypothetical protein
Cc003394	hypothetical protein
Cc003405	Lipid metabolism.glycerolipid synthesis.phosphatidic acid.phosphatidic acid phosphatase
Cc003406	hypothetical protein
Cc003408	Solute transport.carrier-mediated transport.MFS superfamily.SP family.hexose transporter (SGB/GlcT-type)
Cc003414	Solute transport.primary active transport.ABC superfamily.ABC2 family.subfamily ABCG transporter
Cc003424	hypothetical protein
Cc003426	RNA biosynthesis.transcription factor families.bHLH transcription factor
Cc003428	RNA biosynthesis.transcription factor families.AP2/ERF superfamily.DREB-type transcription factor
Cc003431	RNA biosynthesis.transcription factor families.HB (Homeobox) superfamily.HD-ZIP III transcription factor
Cc003432	hypothetical protein
Cc003433	hypothetical protein
Cc003435	hypothetical protein
Cc003437	RNA biosynthesis.RNA polymerase II-dependent transcription.PAF1C transcription initiation and elongation complex.ELF7/PAF1 component
Cc003439	Carbohydrate metabolism.sucrose metabolism.degradation.hexokinase
Cc003442	hypothetical protein
Cc003446	Cell wall.nucleotide sugars.myo-inositol oxidation pathway (MIOP).myo-inositol oxygenase
Cc003452	Protein degradation.peptide tagging.Ubiquitin (UBQ)-anchor addition (ubiquitylation).UBQ-ligase E3 activities.RING-domain E3 ligase activities.RING-HCa-type E3 ligase
Cc003455	hypothetical protein
Cc003463	hypothetical protein
Cc003468	hypothetical protein
Cc003470	hypothetical protein
Cc003471	hypothetical protein
Cc003472	hypothetical protein
Cc003473	Coenzyme metabolism.lipoic acid synthesis.lipoate synthase
Cc003484	Lipid metabolism.glycerolipid synthesis.phosphatidic acid.diacylglycerol kinase
Cc003486	hypothetical protein
Cc003487	hypothetical protein
Cc003488	hypothetical protein
Cc003497	hypothetical protein
Cc003500	Cytoskeleton.microfilament network.actin polymerisation.formin actin filament elongation factor activities.group-I formin
Cc003502	hypothetical protein
Cc003507	hypothetical protein
Cc003509	Solute transport.channel-mediated transport.channels.OSCA calcium-permeable channel
Cc003510	Lipid metabolism.lipid degradation.phospholipase activities.phospholipase A1 activities.PC-PLA1-type phospholipase A1
Cc003518	Solute transport.primary active transport.ABC superfamily.ABC1 family.subfamily ABCC transporter
Cc003522	hypothetical protein
Cc003526	hypothetical protein
Cc003527	hypothetical protein
Cc003529	Solute transport.carrier-mediated transport.APC superfamily.APC family.cationic amino acid transporter (CAT-type)
Cc003532	hypothetical protein
Cc003533	hypothetical protein
Cc003537	hypothetical protein
Cc003543	RNA biosynthesis.transcription factor families.HB (Homeobox) superfamily.HD-ZIP III transcription factor
Cc003549	hypothetical protein
Cc003553	hypothetical protein
Cc003558	hypothetical protein
Cc003561	hypothetical protein
Cc003562	Chromatin assembly and remodeling.histone modifications.histone lysine methylation/demethylation.JmjC group histone demethylase activities.PKDM7-type histone demethylase
Cc003565	hypothetical protein
Cc003580	Phytohormones.salicylic acid.perception and signal transduction.NPR3/4 receptor protein
Cc003588	hypothetical protein
Cc003590	hypothetical protein
Cc003591	hypothetical protein
Cc003598	hypothetical protein
Cc003599	hypothetical protein
Cc003602	Protein modification.phosphorylation.TKL kinase superfamily.MAP3K-RAF kinase
Cc003606	RNA biosynthesis.transcription factor families.PLATZ transcription factor
Cc003607	Solute transport.primary active transport.P-type ATPase superfamily.P1 family.HMA P1B-type heavy metal cation-transporting ATPase
Cc003608	Cell wall.pectin.modification and degradation.polygalacturonase activities.QRT3 polygalacturonase
Cc003612	Membrane vesicle trafficking.endomembrane trafficking.vacuolar sorting.VSR vacuolar sorting receptor
Cc003617	hypothetical protein
Cc003620	Membrane vesicle trafficking.regulation of membrane tethering and fusion.RAB-GTPase-activating protein (RAB-GAP)
Cc003627	hypothetical protein
Cc003629	Membrane vesicle trafficking.clathrin coated vesicle (CCV) machinery.CCV accessory factors.ECA1/2 adaptor protein
Cc003643	Amino acid metabolism.biosynthesis.shikimate family.phenylalanine and tyrosine.Tyr-insensitive prephenate dehydrogenase
Cc003646	hypothetical protein
Cc003647	hypothetical protein
Cc003648	hypothetical protein
Cc003650	hypothetical protein
Cc003658	hypothetical protein
Cc003662	RNA biosynthesis.transcription factor families.NIN-like superfamily.NLP transcription factor
Cc003666	hypothetical protein
Cc003676	Cell wall.pectin.rhamnogalacturonan I.modification and degradation.alpha-L-arabinofuranosidase activities.bifunctional BXL-type alpha-L-arabinofuranosidase and beta-D-xylosidase
Cc003687	hypothetical protein
Cc003694	Protein degradation.ER-associated protein degradation (ERAD) machinery.HRD3 component
Cc003697	Membrane vesicle trafficking.target membrane tethering.Golgi membrane tethering factors.GC2-type golgin
Cc003705	hypothetical protein
Cc003706	hypothetical protein
Cc003710	Cell cycle.regulation.cyclins.CYCT-type cyclin
Cc003720	hypothetical protein
Cc003724	Membrane vesicle trafficking.regulation of membrane tethering and fusion.RAB-GTPase-activating protein (RAB-GAP)
Cc003734	hypothetical protein
Cc003741	hypothetical protein
Cc003748	Cytoskeleton.microtubular network.Kinesin microtubule-based motor protein activities.Kinesin-14 motor protein
Cc003750	Protein modification.dephosphorylation.serine/threonine protein phosphatase superfamily.PPM/PP2C Mn/Mg-dependent phosphatase families.clade H phosphatase
Cc003763	hypothetical protein
Cc003777	hypothetical protein
Cc003780	hypothetical protein
Cc003800	hypothetical protein
Cc003804	hypothetical protein
Cc003807	hypothetical protein
Cc003811	hypothetical protein
Cc003813	Amino acid metabolism.biosynthesis.glutamate family.glutamate-derived amino acids.proline.regulation.PHR1 transcription factor
Cc003820	hypothetical protein
Cc003838	Protein degradation.peptidase families.serine-type peptidase activities.serine carboxypeptidase
Cc003841	hypothetical protein
Cc003846	Protein modification.acetylation.plastidial Nat-type N-terminal acetylase
Cc003856	hypothetical protein
Cc003857	Protein modification.phosphorylation.TKL kinase superfamily.LysM kinase
Cc003863	hypothetical protein
Cc003865	hypothetical protein
Cc003868	Membrane vesicle trafficking.regulation of membrane tethering and fusion.RAB-GTPase activities.F-class RAB GTPase
Cc003870	hypothetical protein
Cc003876	hypothetical protein
Cc003877	hypothetical protein
Cc003891	hypothetical protein
Cc003892	hypothetical protein
Cc003896	RNA biosynthesis.transcription factor families.NAC transcription factor
Cc003902	hypothetical protein
Cc003903	hypothetical protein
Cc003909	hypothetical protein
Cc003910	hypothetical protein
Cc003911	RNA biosynthesis.transcription factor families.TIFY transcription factor
Cc003913	Multi-process regulatory mechanisms.SnRK1 metabolic regulator system.FLZ SnRK1-interacting factor
Cc003916	hypothetical protein
Cc003917	hypothetical protein
Cc003919	Carbohydrate metabolism.sucrose metabolism.degradation.sucrose synthase
Cc003934	hypothetical protein
Cc003940	hypothetical protein
Cc003956	hypothetical protein
Cc003958	hypothetical protein
Cc003961	hypothetical protein
Cc003962	hypothetical protein
Cc003967	hypothetical protein
Cc003982	Protein degradation.peptidase families.aspartic-type peptidase activities.pepsin-type protease
Cc003984	Protein degradation.peptidase families.aspartic-type peptidase activities.pepsin-type protease
Cc003986	hypothetical protein
Cc003990	hypothetical protein
Cc003991	hypothetical protein
Cc003995	Solute transport.channel-mediated transport.channels.VIC superfamily.voltage-gated calcium cation channel (TPC-type)
Cc003996	hypothetical protein
Cc004001	Protein modification.phosphorylation.CMGC kinase superfamily.cyclin-dependent kinase families.CDK9 kinase
Cc004011	Chromatin assembly and remodeling.histone modifications.histone ubiquitination.PRC1 histone mono-ubiquitination complex.modification writer protein components.RING1-type modification writer component
Cc004013	RNA biosynthesis.transcription factor families.AP2/ERF superfamily.ERF-type transcription factor
Cc004018	hypothetical protein
Cc004025	Redox homeostasis.hydrogen peroxide removal.glutaredoxin
Cc004034	hypothetical protein
Cc004045	hypothetical protein
Cc004047	RNA biosynthesis.transcription factor families.HSF (heat shock) transcription factor
Cc004050	hypothetical protein
Cc004055	hypothetical protein
Cc004056	hypothetical protein
Cc004058	hypothetical protein
Cc004064	hypothetical protein
Cc004066	hypothetical protein
Cc004070	RNA biosynthesis.transcription factor families.WRKY transcription factor
Cc004071	Protein modification.phosphorylation.TKL kinase superfamily.RLCK-V kinase
Cc004084	Protein modification.disulfide bond formation.endoplasmic reticulum.thiol-disulfide oxidoreductase (ERO)
Cc004088	Protein modification.phosphorylation.AGC kinase superfamily.AGC-VIII kinase
Cc004090	Redox homeostasis.glutathione S-transferase activities.class tau
Cc004093	Redox homeostasis.glutathione S-transferase activities.class tau
Cc004096	Phytohormones.abscisic acid.synthesis.neoxanthin cleavage protein
Cc004099	hypothetical protein
Cc004102	Protein modification.phosphorylation.CMGC kinase superfamily.MAPK kinase
Cc004106	Protein modification.phosphorylation.TKL kinase superfamily.RLCK-XIII kinase
Cc004110	hypothetical protein
Cc004129	RNA biosynthesis.transcription factor families.FAR1 transcription factor
Cc004131	Redox homeostasis.glutathione S-transferase activities.class lambda
Cc004133	hypothetical protein
Cc004136	hypothetical protein
Cc004138	hypothetical protein
Cc004141	Phytohormones.cytokinin.perception and signal transduction.A-type ARR response negative regulator
Cc004142	hypothetical protein
Cc004143	Nucleotide metabolism.pyrimidines.ribonucleotide anabolism.UMP synthase
Cc004144	hypothetical protein
Cc004169	hypothetical protein
Cc004174	hypothetical protein
Cc004177	hypothetical protein
Cc004178	hypothetical protein
Cc004190	hypothetical protein
Cc004197	hypothetical protein
Cc004199	hypothetical protein
Cc004206	hypothetical protein
Cc004211	Protein biosynthesis.translation initiation.mRNA loading.eIF4F mRNA unwinding complex.eIF4G component
Cc004218	Cell cycle.regulation.cyclins.CYCP-type cyclin
Cc004229	hypothetical protein
Cc004230	hypothetical protein
Cc004231	hypothetical protein
Cc004234	hypothetical protein
Cc004235	hypothetical protein
Cc004239	hypothetical protein
Cc004248	hypothetical protein
Cc004249	hypothetical protein
Cc004256	Cell wall.nucleotide sugars.sugar nucleotide oxidation pathway (SNOP).UDP-D-glucuronic acid 4-epimerase
Cc004259	hypothetical protein
Cc004261	Protein degradation.peptidase families.serine-type peptidase activities.serine carboxypeptidase
Cc004264	hypothetical protein
Cc004266	RNA biosynthesis.transcription factor families.Trihelix transcription factor
Cc004270	hypothetical protein
Cc004272	hypothetical protein
Cc004274	hypothetical protein
Cc004286	hypothetical protein
Cc004289	hypothetical protein
Cc004290	hypothetical protein
Cc004292	Lipid metabolism.fatty acid synthesis.fatty acid desaturation and elongation.fatty acid elongation.fatty acid elongation complex.KCS 3-ketoacyl-CoA synthase
Cc004296	hypothetical protein
Cc004299	Secondary metabolism.terpenoids.terpenoid synthesis.mono-/sesquiterpene-/diterpene synthase
Cc004300	hypothetical protein
Cc004301	hypothetical protein
Cc004303	hypothetical protein
Cc004307	RNA biosynthesis.transcription factor families.LUG transcription cofactor
Cc004308	Phytohormones.gibberellin.synthesis.gibberellin 3-oxidase
Cc004309	RNA biosynthesis.transcription factor families.TIFY transcription factor
Cc004330	hypothetical protein
Cc004331	Nutrient uptake.nitrogen assimilation.aspartate aminotransferase
Cc004334	RNA processing.RNA splicing.U12-type-intron-specific minor spliceosome.U11 small nuclear ribonucleoprotein particle (snRNP).U11-59K snRNP component
Cc004341	Phytohormones.strigolactone.synthesis.CCD8 carotenoid cleavage dioxygenase
Cc004347	RNA biosynthesis.transcription factor families.C2C2 superfamily.GATA transcription factor
Cc004350	hypothetical protein
Cc004351	Solute transport.carrier-mediated transport.CPA superfamily.CPA-2 family.proton:monovalent cation antiporter (CHX-type)
Cc004356	Protein modification.phosphorylation.TKL kinase superfamily.LRR-XV kinase
Cc004357	hypothetical protein
Cc004358	hypothetical protein
Cc004362	Cellular respiration.cytosolic glycolysis.phosphofructokinase activities.ATP-dependent phosphofructokinase
Cc004363	Cellular respiration.cytosolic glycolysis.phosphofructokinase activities.ATP-dependent phosphofructokinase
Cc004368	RNA biosynthesis.transcription factor families.C3H zinc finger transcription factor
Cc004370	Membrane vesicle trafficking.endomembrane trafficking.ESCRT (Endosomal Sorting Complex Required for Transport) complexes.ESCRT-III complex.VPS32/SNF7 component
Cc004377	Protein degradation.peptidase families.cysteine-type peptidase activities.VPE asparaginyl endopeptidase
Cc004378	hypothetical protein
Cc004379	Coenzyme metabolism.tetrapyrrol biosynthesis.heme synthesis and modification.ferrochelatase
Cc004383	Phytohormones.abscisic acid.perception and signaling.PYR/PYL-receptor.cytoplasm-localized receptor complex.PYL/RCAR-type regulatory component
Cc004389	hypothetical protein
Cc004391	hypothetical protein
Cc004396	Cytoskeleton.cp-actin-dependent plastid movement.PMIR cp-actin stability co-factor
Cc004399	Protein modification.phosphorylation.AGC kinase superfamily.AGC-VII/NDR kinase
Cc004401	Phytohormones.cytokinin.synthesis.cytokinin phosphoribohydrolase
Cc004402	Solute transport.carrier-mediated transport.MC-type solute transporter
Cc004403	Solute transport.carrier-mediated transport.MC-type solute transporter
Cc004406	Solute transport.channel-mediated transport.channels.MSL mechanosensitive ion channel
Cc004408	Polyamine metabolism.spermidine/spermine.synthesis.thermospermine synthase
Cc004410	hypothetical protein
Cc004411	hypothetical protein
Cc004414	Phytohormones.cytokinin.conjugation and degradation.cytokinin dehydrogenase
Cc004425	Solute transport.channel-mediated transport.channels.COPT copper cation channel
Cc004426	hypothetical protein
Cc004434	Phytohormones.ethylene.perception and signal transduction.EBF-type signal transducer
Cc004437	hypothetical protein
Cc004440	hypothetical protein
Cc004441	hypothetical protein
Cc004456	Solute transport.primary active transport.ABC superfamily.ABC1 family.subfamily ABCB transporter
Cc004461	hypothetical protein
Cc004472	hypothetical protein
Cc004475	hypothetical protein
Cc004478	hypothetical protein
Cc004485	Cell wall.pectin.modification and degradation.pectate lyase
Cc004486	hypothetical protein
Cc004487	hypothetical protein
Cc004490	Cell cycle.mitosis and meiosis.sister chromatid separation.cohesin establishment.PDS5 cohesin cofactor
Cc004493	hypothetical protein
Cc004495	hypothetical protein
Cc004512	Amino acid metabolism.biosynthesis.aspartate family.aspartate-derived amino acids.methionine.S-methylmethionine cycle.methionine S-methyltransferase
Cc004519	hypothetical protein
Cc004525	hypothetical protein
Cc004528	Solute transport.carrier-mediated transport.APC superfamily.APC family.amino acid transporter (LAT-type)
Cc004529	hypothetical protein
Cc004532	hypothetical protein
Cc004535	Cell wall.pectin.modification and degradation.pectin acetylesterase
Cc004541	hypothetical protein
Cc004559	hypothetical protein
Cc004560	hypothetical protein
Cc004561	Protein degradation.peptidase families.cysteine-type peptidase activities.pyroglutamyl-peptidase-type protease
Cc004563	Phytohormones.brassinosteroid.perception and signal transduction.GSK3-type protein kinase (BIN2)
Cc004569	Carbohydrate metabolism.raffinose family oligosaccharide biosynthesis.galactinol synthase
Cc004570	hypothetical protein
Cc004580	hypothetical protein
Cc004595	hypothetical protein
Cc004600	RNA biosynthesis.transcription factor families.HB (Homeobox) superfamily.KNOX transcription factor
Cc004627	hypothetical protein
Cc004629	hypothetical protein
Cc004636	Amino acid metabolism.biosynthesis.shikimate family.phenylalanine and tyrosine.chorismate mutase
Cc004639	Cell wall.pectin.homogalacturonan.modification and degradation.pectin methylesterase
Cc004644	hypothetical protein
Cc004647	hypothetical protein
Cc004649	Protein degradation.peptide tagging.Ubiquitin (UBQ)-anchor addition (ubiquitylation).UBQ-ligase E3 activities.RING-domain E3 ligase activities.RING-H2-type E3 ligase
Cc004672	Lipid metabolism.lipid bodies-associated activities.LDAP protein
Cc004690	Membrane vesicle trafficking.autophagosome formation.ATG9-2-18 membrane shuttling complex.ATG18 component
Cc004691	hypothetical protein
Cc004700	Solute transport.carrier-mediated transport.CPA superfamily.CPA-1 family.proton:sodium cation antiporter (NHX-type)
Cc004713	hypothetical protein
Cc004714	hypothetical protein
Cc004722	Polyamine metabolism.spermidine/spermine.synthesis.S-adenosyl methionine decarboxylase
Cc004725	RNA biosynthesis.transcription factor families.FAR1 transcription factor
Cc004727	hypothetical protein
Cc004729	hypothetical protein
Cc004731	hypothetical protein
Cc004735	Polyamine metabolism.putrescine.degradation.diamine oxidase
Cc004736	hypothetical protein
Cc004737	hypothetical protein
Cc004738	Solute transport.carrier-mediated transport.MFS superfamily.SP family.monosaccharide transporter (STP-type)
Cc004739	Cell cycle.regulation.cyclins.CYCT-type cyclin
Cc004743	hypothetical protein
Cc004746	Protein degradation.peptide tagging.Ubiquitin (UBQ)-anchor addition (ubiquitylation).UBQ-ligase E3 activities.RING-domain E3 ligase activities.RING-H2-type E3 ligase
Cc004751	hypothetical protein
Cc004752	Solute transport.channel-mediated transport.channels.MIP family.Nodulin-26-like intrinsic protein (NIP-type)
Cc004753	RNA processing.organelle machineries.RNA editing.mitochondrial RNA editing.MEF12 RNA editing factor
Cc004754	hypothetical protein
Cc004756	hypothetical protein
Cc004771	RNA biosynthesis.transcription factor families.PHD finger transcription factor
Cc004772	hypothetical protein
Cc004774	Protein degradation.peptidase families.aspartic-type peptidase activities.pepsin-type protease
Cc004775	Protein modification.phosphorylation.TKL kinase superfamily.MAP3K-RAF kinase
Cc004788	hypothetical protein
Cc004790	hypothetical protein
Cc004791	hypothetical protein
Cc004792	Amino acid metabolism.biosynthesis.aspartate family.aspartate-derived amino acids.methionine.salvage pathway.acireductone dioxygenase
Cc004796	hypothetical protein
Cc004797	RNA biosynthesis.RNA polymerase II-dependent transcription.MEDIATOR transcription co-activator complex.tail module.MED2/MED29/MED32 component
Cc004799	hypothetical protein
Cc004800	hypothetical protein
Cc004802	Cell cycle.mitosis and meiosis.meiotic recombination.DNA strand exchange.recombinase (DMC1)
Cc004803	Chromatin assembly and remodeling.DNA methylation.canonical RNA-directed DNA methylation pathway.AGO siRNA-integrating factor
Cc004806	Membrane vesicle trafficking.Coat protein I (COPI) coatomer machinery.coat protein recruiting.ARF-GTPase
Cc004811	hypothetical protein
Cc004818	RNA biosynthesis.DNA-dependent RNA polymerase (Pol) complexes.subunit 7
Cc004829	Protein modification.phosphorylation.TKL kinase superfamily.DUF26 kinase
Cc004830	Protein modification.phosphorylation.TKL kinase superfamily.DUF26 kinase
Cc004839	Lipid metabolism.lipid degradation.fatty acid degradation.auxiliary degradation activities.dodecenoyl-CoA isomerase
Cc004843	RNA biosynthesis.transcription factor families.bHLH transcription factor
Cc004845	RNA biosynthesis.transcription factor families.AP2/ERF superfamily.ERF-type transcription factor
Cc004846	hypothetical protein
Cc004850	Protein modification.dephosphorylation.serine/threonine protein phosphatase superfamily.PPP Fe-Zn-dependent phosphatase families.PP1 phosphatase
Cc004851	Photosynthesis.CAM/C4 photosynthesis.phosphoenolpyruvate (PEP) carboxylase activity.regulation.PEP carboxylase kinase
Cc004853	RNA biosynthesis.transcription factor families.MYB superfamily.MYB transcription factor
Cc004854	RNA biosynthesis.DNA-dependent RNA polymerase (Pol) complexes.subunit 7
Cc004856	Solute transport.carrier-mediated transport.IT superfamily.phosphate transporter (PHO-type)
Cc004857	hypothetical protein
Cc004860	hypothetical protein
Cc004863	Protein modification.phosphorylation.AGC kinase superfamily.AGC-VII/NDR kinase
Cc004869	Solute transport.primary active transport.ABC superfamily.ABC1 family.subfamily ABCC transporter
Cc004872	hypothetical protein
Cc004876	hypothetical protein
Cc004886	Carbohydrate metabolism.oxidative pentose phosphate pathway.oxidative phase.6-phosphogluconolactonase
Cc004900	hypothetical protein
Cc004904	hypothetical protein
Cc004923	RNA biosynthesis.RNA polymerase III-dependent transcription.TFIIIe transcription factor complex.RPC31 component
Cc004924	hypothetical protein
Cc004926	hypothetical protein
Cc004934	RNA biosynthesis.transcription factor families.bHLH transcription factor
Cc004937	hypothetical protein
Cc004942	Protein degradation.peptidase families.aspartic-type peptidase activities.pepsin-type protease
Cc004943	Protein degradation.peptidase families.aspartic-type peptidase activities.pepsin-type protease
Cc004944	Protein degradation.peptidase families.aspartic-type peptidase activities.pepsin-type protease
Cc004946	Cell wall.pectin.modification and degradation.pectate lyase
Cc004948	hypothetical protein
Cc004964	hypothetical protein
Cc004965	hypothetical protein
Cc004966	hypothetical protein
Cc004970	RNA biosynthesis.transcription factor families.C2C2 superfamily.GATA transcription factor
Cc004971	Chromatin assembly and remodeling.histone modifications.histone lysine methylation/demethylation.class V/Su(var) histone methyltransferase component
Cc004979	hypothetical protein
Cc004985	hypothetical protein
Cc004989	Amino acid metabolism.biosynthesis.shikimate family.shikimate pathway.3-dehydroquinate synthase
Cc004992	Cell wall.cell wall proteins.expansins.beta-like-type expansin
Cc004993	hypothetical protein
Cc004998	hypothetical protein
Cc005030	hypothetical protein
Cc005031	hypothetical protein
Cc005051	hypothetical protein
Cc005063	hypothetical protein
Cc005072	hypothetical protein
Cc005086	Cytoskeleton.microfilament network.myosin microfilament-based motor protein activities.MyoB myosin receptor
Cc005090	hypothetical protein
Cc005093	RNA biosynthesis.transcription factor families.bZIP superfamily.bZIP transcription factor
Cc005111	hypothetical protein
Cc005113	hypothetical protein
Cc005116	hypothetical protein
Cc005122	Lipid metabolism.lipid degradation.phospholipase activities.phospholipase A1 activities.PC-PLA1-type phospholipase A1
Cc005126	Solute transport.carrier-mediated transport.APC superfamily.APC family.cationic amino acid transporter (CAT-type)
Cc005127	hypothetical protein
Cc005136	hypothetical protein
Cc005140	hypothetical protein
Cc005146	RNA biosynthesis.transcription factor families.AS2/LOB transcription factor
Cc005151	Phytohormones.brassinosteroid.perception and signal transduction.GSK3-type protein kinase (BIN2)
Cc005170	hypothetical protein
Cc005171	hypothetical protein
Cc005176	hypothetical protein
Cc005177	hypothetical protein
Cc005178	Chromatin assembly and remodeling.chromatin remodeling complexes.ATPase core components.Snf2-like group ISWI.Snf2 chromatin remodeling factor
Cc005182	Nutrient uptake.iron uptake.reduction-based strategy uptake.Fe(III)-chelate reductase
Cc005184	hypothetical protein
Cc005185	hypothetical protein
Cc005186	Phytohormones.cytokinin.perception and signal transduction.AHP-type signal transducer
Cc005191	hypothetical protein
Cc005194	Redox homeostasis.hydrogen peroxide removal.glutathione peroxidase
Cc005195	Protein degradation.peptidase families.aspartic-type peptidase activities.pepsin-type protease
Cc005199	Phytohormones.gibberellin.synthesis.ent-copalyl diphosphate synthase
Cc005206	hypothetical protein
Cc005212	Protein modification.phosphorylation.NEK kinase
Cc005213	hypothetical protein
Cc005214	hypothetical protein
Cc005215	hypothetical protein
Cc005216	Protein modification.dephosphorylation.serine/threonine protein phosphatase superfamily.PPM/PP2C Mn/Mg-dependent phosphatase families.clade J phosphatase
Cc005222	hypothetical protein
Cc005224	RNA biosynthesis.transcription factor families.bHLH transcription factor
Cc005234	Chromatin assembly and remodeling.histone modifications.histone ubiquitination.PRC1 histone mono-ubiquitination complex.modification writer protein components.BMI1-type modification writer component
Cc005237	hypothetical protein
Cc005251	hypothetical protein
Cc005252	RNA biosynthesis.transcription factor families.NAC transcription factor
Cc005258	Protein modification.phosphorylation.CK kinase superfamily.CKL protein kinase
Cc005262	hypothetical protein
Cc005272	hypothetical protein
Cc005273	hypothetical protein
Cc005276	hypothetical protein
Cc005304	Protein modification.phosphorylation.TKL kinase superfamily.RLCK-VII kinase families.RLCK-VIIa kinase
Cc005306	RNA biosynthesis.transcription factor families.BSD transcription factor
Cc005307	hypothetical protein
Cc005319	hypothetical protein
Cc005320	hypothetical protein
Cc005321	hypothetical protein
Cc005325	Protein modification.phosphorylation.AGC kinase superfamily.AGC-VIII kinase
Cc005328	Protein modification.phosphorylation.TKL kinase superfamily.LRR-XII kinase
Cc005330	hypothetical protein
Cc005332	hypothetical protein
Cc005335	hypothetical protein
Cc005336	hypothetical protein
Cc005337	hypothetical protein
Cc005343	Protein modification.phosphorylation.TKL kinase superfamily.LRR-X kinase families.LRR-Xa kinase
Cc005344	Cytoskeleton.microfilament network.actin polymerisation.formin actin filament elongation factor activities.group-I formin
Cc005366	Protein translocation.nucleus.nucleocytoplasmic transport.nuclear pore complex (NPC).outer ring.GLE1 scaffold nucleoporin
Cc005382	Solute transport.channel-mediated transport.channels.FEX fluoride anion export channel
Cc005402	Solute transport.carrier-mediated transport.MFS superfamily.SUT/SUC sugar transporter
Cc005434	hypothetical protein
Cc005435	Coenzyme metabolism.Coenzyme A synthesis.pantothenate kinase
Cc005437	hypothetical protein
Cc005442	hypothetical protein
Cc005443	hypothetical protein
Cc005444	Protein degradation.peptide tagging.Ubiquitin (UBQ)-anchor addition (ubiquitylation).UBQ-ligase E3 activities.U-Box E3 ligase activities.PUB-type
Cc005460	hypothetical protein
Cc005474	hypothetical protein
Cc005479	Protein degradation.peptide tagging.Ubiquitin (UBQ)-anchor addition (ubiquitylation).UBQ-ligase E3 activities.RING-domain E3 ligase activities.RING-H2-type E3 ligase
Cc005480	Protein modification.phosphorylation.TKL kinase superfamily.RLCK-VII kinase families.RLCK-VIIa kinase
Cc005481	hypothetical protein
Cc005482	RNA biosynthesis.transcription factor families.bHLH transcription factor
Cc005483	RNA biosynthesis.transcription factor families.HB (Homeobox) superfamily.zf-HD transcription factor
Cc005485	Protein degradation.peptide tagging.Ubiquitin (UBQ)-anchor addition (ubiquitylation).UBQ-ligase E3 activities.RING-domain E3 ligase activities.RING-v-type E3 ligase
Cc005490	hypothetical protein
Cc005492	RNA biosynthesis.transcription factor families.NAC transcription factor
Cc005493	Cell wall.hemicellulose.xyloglucan.synthesis.GDP-fucose-dependent 1,2-alpha-fucosyltransferase
Cc005495	hypothetical protein
Cc005498	hypothetical protein
Cc005499	Protein modification.phosphorylation.CMGC kinase superfamily.cyclin-dependent kinase families.CDK9 kinase
Cc005500	hypothetical protein
Cc005501	hypothetical protein
Cc005502	Membrane vesicle trafficking.SNARE target membrane recognition and fusion complexes.Qbc-type SNARE components.SNAP25 group protein
Cc005504	RNA biosynthesis.transcription factor families.C2H2 zinc finger transcription factor
Cc005505	RNA biosynthesis.transcription factor families.ARID transcription factor
Cc005507	hypothetical protein
Cc005518	hypothetical protein
Cc005523	Cell wall.nucleotide sugars.sugar nucleotide oxidation pathway (SNOP).UDP-L-arabinose mutase
Cc005524	hypothetical protein
Cc005526	Protein translocation.plasmodesmata intercellular trafficking.MPB2C regulator protein
Cc005529	RNA biosynthesis.transcription factor families.C2C2 superfamily.DOF transcription factor
Cc005534	Secondary metabolism.phenolics.flavonoid synthesis and modification.flavonoid glycosylation.flavonol-3-O-glycoside-rhamnosyltransferase
Cc005535	hypothetical protein
Cc005539	hypothetical protein
Cc005540	hypothetical protein
Cc005542	RNA biosynthesis.transcription factor families.bZIP superfamily.bZIP transcription factor
Cc005543	Solute transport.carrier-mediated transport.VIT family.iron cation transporter (VTL-type)
Cc005565	RNA biosynthesis.transcription factor families.AP2/ERF superfamily.ERF-type transcription factor
Cc005567	RNA processing.RNA quality control Exon Junction complex (EJC).peripheral components.ACINUS component
Cc005573	RNA biosynthesis.transcription factor families.AP2/ERF superfamily.DREB-type transcription factor
Cc005574	hypothetical protein
Cc005575	Solute transport.carrier-mediated transport.MFS superfamily.MFS-type solute transporter
Cc005577	Solute transport.carrier-mediated transport.MFS superfamily.MFS-type solute transporter
Cc005579	hypothetical protein
Cc005599	hypothetical protein
Cc005601	hypothetical protein
Cc005604	hypothetical protein
Cc005611	hypothetical protein
Cc005614	hypothetical protein
Cc005626	hypothetical protein
Cc005628	hypothetical protein
Cc005631	Protein degradation.peptidase families.cysteine-type peptidase activities.ubiquitin-specific protease
Cc005638	Solute transport.carrier-mediated transport.OPT family.oligopeptide transporter (OPT-type)
Cc005639	Protein modification.phosphorylation.CAMK kinase superfamily.SNF1-related SnRK3 kinase
Cc005641	hypothetical protein
Cc005642	RNA biosynthesis.transcription factor families.bHLH transcription factor
Cc005643	Carbohydrate metabolism.gluconeogenesis.phosphoenolpyruvate carboxykinase
Cc005644	hypothetical protein
Cc005646	Solute transport.carrier-mediated transport.MFS superfamily.SUT/SUC sugar transporter
Cc005647	Protein modification.phosphorylation.TKL kinase superfamily.LRR-XI kinase
Cc005655	RNA biosynthesis.transcription factor families.HB (Homeobox) superfamily.HD-ZIP I/II transcription factor
Cc005663	hypothetical protein
Cc005669	hypothetical protein
Cc005671	RNA biosynthesis.transcription factor families.C2H2 zinc finger transcription factor
Cc005674	hypothetical protein
Cc005676	hypothetical protein
Cc005677	hypothetical protein
Cc005679	RNA biosynthesis.transcription factor families.MADS box transcription factor
Cc005680	Cell cycle.regulation.cyclins.CYCA-type cyclin
Cc005684	hypothetical protein
Cc005686	hypothetical protein
Cc005687	RNA biosynthesis.transcription factor families.WRKY transcription factor
Cc005691	RNA biosynthesis.transcription factor families.AP2/ERF superfamily.DREB-type transcription factor
Cc005693	Protein degradation.peptide tagging.Ubiquitin (UBQ)-anchor addition (ubiquitylation).UBQ-ligase E3 activities.RING-domain E3 ligase activities.RING-H2-type E3 ligase
Cc005705	Protein modification.phosphorylation.AGC kinase superfamily.AGC-VII/NDR kinase
Cc005708	Phytohormones.abscisic acid.conjugation and degradation.abscisic acid hydroxylase
Cc005720	hypothetical protein
Cc005725	hypothetical protein
Cc005732	hypothetical protein
Cc005733	hypothetical protein
Cc005743	Solute transport.carrier-mediated transport.APC superfamily.AAAP family.amino acid transporter (LHT-type)
Cc005747	Phytohormones.jasmonic acid.synthesis.allene oxidase synthase (AOS)
Cc005751	hypothetical protein
Cc005757	Membrane vesicle trafficking.autophagosome formation.ATG9-2-18 membrane shuttling complex.ATG9 component
Cc005758	hypothetical protein
Cc005759	hypothetical protein
Cc005764	RNA biosynthesis.transcription factor families.FAR1 transcription factor
Cc005766	hypothetical protein
Cc005777	hypothetical protein
Cc005778	Solute transport.primary active transport.P-type ATPase superfamily.P2 family.ACA P2B-type calcium cation-transporting ATPase
Cc005779	hypothetical protein
Cc005780	hypothetical protein
Cc005783	hypothetical protein
Cc005784	hypothetical protein
Cc005785	Lipid metabolism.fatty acid synthesis.fatty acid desaturation and elongation.fatty acid elongation.fatty acid elongation complex.KCS 3-ketoacyl-CoA synthase
Cc005787	Protein modification.phosphorylation.TKL kinase superfamily.LysM kinase
Cc005788	RNA biosynthesis.transcription factor families.bHLH transcription factor
Cc005791	hypothetical protein
Cc005793	Solute transport.channel-mediated transport.channels.CorA family.MRS/MGT metal cation transporter
Cc005797	Membrane vesicle trafficking.autophagosome formation.TRAF1 autophagy regulator protein
Cc005807	hypothetical protein
Cc005815	hypothetical protein
Cc005816	hypothetical protein
Cc005817	Protein modification.dephosphorylation.serine/threonine protein phosphatase superfamily.PPP Fe-Zn-dependent phosphatase families.SLP phosphatase
Cc005821	Cell cycle.cytokinesis.phragmoplast disassembly.NACK-PQR signaling pathway.NRK/MPK MAP-kinase
Cc005827	Solute transport.carrier-mediated transport.DMT superfamily.NST-TPT group.UTR1/5 nucleotide sugar transporter
Cc005829	RNA biosynthesis.transcription factor families.HB (Homeobox) superfamily.KNOX transcription factor
Cc005844	hypothetical protein
Cc005853	hypothetical protein
Cc005854	Carbohydrate metabolism.sucrose metabolism.synthesis.cytosolic phosphoglucose isomerase
Cc005870	hypothetical protein
Cc005875	hypothetical protein
Cc005891	hypothetical protein
Cc005892	hypothetical protein
Cc005894	Protein modification.phosphorylation.TKL kinase superfamily.LRR-I kinase
Cc005896	Protein degradation.peptide tagging.Ubiquitin (UBQ)-anchor addition (ubiquitylation).UBQ-ligase E3 activities.RING-domain E3 ligase activities.RING-HCa-type E3 ligase
Cc005901	hypothetical protein
Cc005902	hypothetical protein
Cc005913	hypothetical protein
Cc005922	hypothetical protein
Cc005930	hypothetical protein
Cc005942	Protein modification.phosphorylation.TKL kinase superfamily.DUF26 kinase
Cc005945	Protein modification.phosphorylation.TKL kinase superfamily.LRR-II kinase
Cc005946	hypothetical protein
Cc005947	Secondary metabolism.phenolics.regulation of key enzymes.KFB-CHS proteolytic chalcone synthase regulator
Cc005959	Coenzyme metabolism.Coenzyme A synthesis.pantothenate kinase
Cc005961	hypothetical protein
Cc005974	hypothetical protein
Cc005977	hypothetical protein
Cc005981	Solute transport.carrier-mediated transport.APC superfamily.HAK/KUP/KT potassium cation transporter
Cc005982	hypothetical protein
Cc005984	hypothetical protein
Cc006001	hypothetical protein
Cc006002	Cell wall.sporopollenin.synthesis.medium-chain fatty acid hydroxylase
Cc006005	Protein degradation.peptidase families.metallopeptidase activities.Matrixin-type metalloprotease
Cc006012	Solute transport.carrier-mediated transport.TOC superfamily.TSUP transport protein
Cc006014	Protein degradation.peptide tagging.Ubiquitin (UBQ)-anchor addition (ubiquitylation).UBQ-ligase E3 activities.HECT E3 monomeric ligase
Cc006022	hypothetical protein
Cc006035	hypothetical protein
Cc006042	hypothetical protein
Cc006046	RNA biosynthesis.transcription factor families.HB (Homeobox) superfamily.HD-ZIP I/II transcription factor
Cc006055	hypothetical protein
Cc006056	hypothetical protein
Cc006059	Solute transport.carrier-mediated transport.MC-type solute transporter
Cc006068	hypothetical protein
Cc006078	hypothetical protein
Cc006081	RNA biosynthesis.transcription factor families.AP2/ERF superfamily.AP2-type transcription factor
Cc006092	RNA biosynthesis.RNA polymerase II-dependent transcription.ELONGATOR transcription elongation complex.ELP4 component
Cc006094	hypothetical protein
Cc006102	RNA processing.messenger ribonucleoprotein particle (mRNP).mRNP export.TREX/THO mRNP trafficking complex.ALY/Tho4 mRNA-binding adaptor component
Cc006106	RNA biosynthesis.transcription factor families.MYB superfamily.MYB transcription factor
Cc006114	Protein degradation.peptidase families.aspartic-type peptidase activities.pepsin-type protease
Cc006122	hypothetical protein
Cc006125	RNA biosynthesis.transcription factor families.NAC transcription factor
Cc006142	Membrane vesicle trafficking.regulation of membrane tethering and fusion.RAB-GTPase activities.F-class RAB GTPase
Cc006144	hypothetical protein
Cc006148	hypothetical protein
Cc006156	hypothetical protein
Cc006162	hypothetical protein
Cc006167	Protein modification.dephosphorylation.serine/threonine protein phosphatase superfamily.PPM/PP2C Mn/Mg-dependent phosphatase families.clade D phosphatase
Cc006170	Protein modification.hydroxylation.prolyl hydroxylase
Cc006172	hypothetical protein
Cc006175	hypothetical protein
Cc006177	hypothetical protein
Cc006184	hypothetical protein
Cc006187	hypothetical protein
Cc006199	Protein modification.phosphorylation.TKL kinase superfamily.CrlRLK1 kinase
Cc006200	Protein modification.phosphorylation.TKL kinase superfamily.RLCK-VII kinase families.RLCK-VIIa kinase
Cc006216	Protein modification.phosphorylation.CAMK kinase superfamily.SNF1-related SnRK2 kinase
Cc006217	hypothetical protein
Cc006229	Phytohormones.abscisic acid.synthesis.neoxanthin cleavage protein
Cc006253	hypothetical protein
Cc006254	Solute transport.channel-mediated transport.channels.CorA family.CorA metal cation transporter
Cc006265	hypothetical protein
Cc006266	Protein degradation.peptidase families.serine-type peptidase activities.subtilisin-type protease families.SBT5 protease
Cc006272	hypothetical protein
Cc006274	hypothetical protein
Cc006281	hypothetical protein
Cc006282	hypothetical protein
Cc006288	RNA biosynthesis.transcription factor families.WRKY transcription factor
Cc006289	hypothetical protein
Cc006290	hypothetical protein
Cc006296	Protein modification.phosphorylation.CAMK kinase superfamily.SNF1-related SnRK3 kinase
Cc006304	RNA biosynthesis.transcription factor families.C2C2 superfamily.DOF transcription factor
Cc006305	hypothetical protein
Cc006312	Lipid metabolism.lipid degradation.phospholipase activities.phospholipase A1 activities.PC-PLA1-type phospholipase A1
Cc006314	hypothetical protein
Cc006316	hypothetical protein
Cc006319	hypothetical protein
Cc006320	hypothetical protein
Cc006328	Protein modification.phosphorylation.TKL kinase superfamily.LRR-XI kinase
Cc006329	hypothetical protein
Cc006331	hypothetical protein
Cc006332	hypothetical protein
Cc006337	RNA biosynthesis.transcription factor families.C2C2 superfamily.DOF transcription factor
Cc006338	hypothetical protein
Cc006340	hypothetical protein
Cc006341	Protein modification.phosphorylation.TKL kinase superfamily.MAP3K-RAF kinase
Cc006343	hypothetical protein
Cc006356	hypothetical protein
Cc006357	Chromatin assembly and remodeling.chromatin remodeling complexes.ATPase core components.Rad5/16-like group.Rad5/16 chromatin remodeling factor
Cc006359	RNA biosynthesis.transcription factor families.MYB superfamily.MYB-related transcription factor
Cc006360	hypothetical protein
Cc006362	hypothetical protein
Cc006374	hypothetical protein
Cc006392	hypothetical protein
Cc006409	hypothetical protein
Cc006418	RNA biosynthesis.transcription factor families.WRKY transcription factor
Cc006421	hypothetical protein
Cc006426	RNA biosynthesis.transcription factor families.WRKY transcription factor
Cc006430	hypothetical protein
Cc006435	hypothetical protein
Cc006436	hypothetical protein
Cc006439	Multi-process regulatory mechanisms.Rop GTPase regulatory system.RopGDI guanine nucleotide dissociation inhibitor
Cc006444	Protein degradation.peptide tagging.Ubiquitin (UBQ)-anchor addition (ubiquitylation).UBQ-ligase E3 activities.HECT E3 monomeric ligase
Cc006446	Redox homeostasis.low-molecular-weight scavengers.ascorbate biosynthesis.L-galactose-1-phosphate phosphatase (VTC4)
Cc006467	hypothetical protein
Cc006468	hypothetical protein
Cc006473	hypothetical protein
Cc006476	Cell wall.cell wall proteins.hydroxyproline-rich glycoproteins.arabinogalactan proteins (AGPs).glycoproteins.xylogen-type arabinogalactan protein
Cc006478	Phytohormones.brassinosteroid.perception and signal transduction.receptor complex.SERK-type co-receptor kinase (BAK)
Cc006481	hypothetical protein
Cc006482	hypothetical protein
Cc006483	hypothetical protein
Cc006501	hypothetical protein
Cc006513	hypothetical protein
Cc006518	hypothetical protein
Cc006523	RNA biosynthesis.transcription factor families.TCP transcription factor
Cc006533	hypothetical protein
Cc006536	Phytohormones.brassinosteroid.perception and signal transduction.GSK3-type protein kinase (BIN2)
Cc006559	Phytohormones.ethylene.synthesis.1-aminocyclopropane-1-carboxylate (ACC) oxidase
Cc006564	hypothetical protein
Cc006576	Chromatin assembly and remodeling.histone modifications.histone lysine methylation/demethylation.JmjC group histone demethylase activities.KDM3-type histone demethylase
Cc006579	Protein degradation.peptidase families.aspartic-type peptidase activities.pepsin-type protease
Cc006580	hypothetical protein
Cc006584	hypothetical protein
Cc006586	hypothetical protein
Cc006587	hypothetical protein
Cc006597	Cell wall.lignin.monolignol glycosylation and deglycosylation.coniferin beta-glucosidase
Cc006604	Cell wall.pectin.homogalacturonan.modification and degradation.pectin methylesterase
Cc006609	Cell wall.pectin.homogalacturonan.modification and degradation.pectin methylesterase
Cc006620	hypothetical protein
Cc006622	hypothetical protein
Cc006623	hypothetical protein
Cc006624	Solute transport.carrier-mediated transport.ENT nucleoside transporter
Cc006628	hypothetical protein
Cc006629	Solute transport.carrier-mediated transport.MFS superfamily.SP family.monosaccharide transporter (STP-type)
Cc006633	hypothetical protein
Cc006635	hypothetical protein
Cc006641	Lipid metabolism.sphingolipid metabolism.sphingosine kinase
Cc006643	hypothetical protein
Cc006644	Protein degradation.peptidase families.serine-type peptidase activities.serine carboxypeptidase
Cc006647	Chromatin assembly and remodeling.chromatin remodeling complexes.ATPase core components.Rad5/16-like group.Rad5/16 chromatin remodeling factor
Cc006649	hypothetical protein
Cc006651	Cell cycle.cytokinesis.phragmoplast disassembly.Katanin ATP-dependent microtubule severing complex.regulatory component
Cc006652	hypothetical protein
Cc006654	hypothetical protein
Cc006655	hypothetical protein
Cc006656	hypothetical protein
Cc006661	hypothetical protein
Cc006662	hypothetical protein
Cc006666	Coenzyme metabolism.phylloquinone synthesis.1,4-dihydroxy-2-naphthoyl-CoA thioesterase
Cc006668	hypothetical protein
Cc006670	Protein degradation.peptide tagging.Ubiquitin (UBQ)-anchor addition (ubiquitylation).UBQ-ligase E3 activities.RING-domain E3 ligase activities.RING-HCa-type E3 ligase
Cc006686	hypothetical protein
Cc006687	Protein modification.phosphorylation.TKL kinase superfamily.MAP3K-RAF kinase
Cc006688	hypothetical protein
Cc006689	hypothetical protein
Cc006697	RNA biosynthesis.transcription factor families.AP2/ERF superfamily.ERF-type transcription factor
Cc006707	hypothetical protein
Cc006715	hypothetical protein
Cc006716	hypothetical protein
Cc006719	hypothetical protein
Cc006723	hypothetical protein
Cc006725	Environmental stimuli response.temperature.Hsp (heat-shock-responsive protein) families.sHsp (small heat-shock-responsive protein) families.class-C-II protein
Cc006729	hypothetical protein
Cc006746	hypothetical protein
Cc006754	hypothetical protein
Cc006758	hypothetical protein
Cc006762	hypothetical protein
Cc006768	Protein modification.phosphorylation.TKL kinase superfamily.CrlRLK1 kinase
Cc006770	Cell wall.hemicellulose.heteromannan.modification and degradation.endo-beta-1,4-mannanase
Cc006771	Protein modification.phosphorylation.AGC kinase superfamily.AGC-VI/PKA kinase
Cc006780	hypothetical protein
Cc006781	Protein modification.phosphorylation.CAMK kinase superfamily.SNF1-related SnRK3 kinase
Cc006782	hypothetical protein
Cc006786	hypothetical protein
Cc006787	Membrane vesicle trafficking.endomembrane trafficking.protein recycling.ubiquitylated cargo adaptors.TOM associated protein
Cc006788	hypothetical protein
Cc006789	hypothetical protein
Cc006790	hypothetical protein
Cc006791	hypothetical protein
Cc006792	Cytoskeleton.microfilament network.actin polymerisation.SCAR/WAVE ARP2/3-activating complex.SCAR component
Cc006795	Protein translocation.plasmodesmata intercellular trafficking.SIEL regulator protein
Cc006797	hypothetical protein
Cc006799	Secondary metabolism.phenolics.p-coumaroyl-CoA synthesis.phenylalanine ammonia lyase
Cc006801	hypothetical protein
Cc006802	hypothetical protein
Cc006810	Phytohormones.ethylene.synthesis.ETO-type regulator protein
Cc006816	Carbohydrate metabolism.fermentation.alcoholic fermentation.pyruvate decarboxylase
Cc006821	hypothetical protein
Cc006822	hypothetical protein
Cc006828	RNA biosynthesis.transcription factor families.Alfin-like transcription factor
Cc006829	RNA processing.RNA 3-end polyadenylation.Cleavage and Polyadenylation Specificity Factor (CPSF) complex.Symplekin/Pta1 component
Cc006830	hypothetical protein
Cc006831	Solute transport.carrier-mediated transport.CDF superfamily.CaCA family.cation antiporter (CAX-type)
Cc006832	Protein degradation.peptide tagging.Ubiquitin (UBQ)-anchor addition (ubiquitylation).UBQ-ligase E3 activities.RING-domain E3 ligase activities.RING-HCa-type E3 ligase
Cc006835	hypothetical protein
Cc006836	Solute transport.carrier-mediated transport.APC superfamily.AAAP family.auxin transporter (AUX/LAX-type)
Cc006848	Solute transport.carrier-mediated transport.MFS superfamily.PHT4 phosphate transporter
Cc006849	RNA processing.RNA 5-end cap adding.RNA capping enzyme
Cc006853	hypothetical protein
Cc006856	Lipid metabolism.sphingolipid metabolism.inositol phosphorylceramide synthase
Cc006859	hypothetical protein
Cc006866	RNA biosynthesis.transcription factor families.C2H2 zinc finger transcription factor
Cc006867	hypothetical protein
Cc006872	hypothetical protein
Cc006882	hypothetical protein
Cc006883	RNA biosynthesis.transcription factor families.MYB superfamily.MYB transcription factor
Cc006884	hypothetical protein
Cc006885	hypothetical protein
Cc006886	Protein modification.dephosphorylation.serine/threonine protein phosphatase superfamily.PPM/PP2C Mn/Mg-dependent phosphatase families.clade C phosphatase
Cc006896	Protein degradation.peptide tagging.Ubiquitin (UBQ)-anchor addition (ubiquitylation).UBQ-ligase E3 activities.RING-domain E3 ligase activities.RING-v-type E3 ligase
Cc006902	hypothetical protein
Cc006905	hypothetical protein
Cc006906	Phytohormones.salicylic acid.perception and signal transduction.NPR3/4 receptor protein
Cc006907	hypothetical protein
Cc006908	Multi-process regulatory mechanisms.Rop GTPase regulatory system.RopGEF guanine nucleotide exchange activities.DH-type exchange factor (SWAP70)
Cc006911	hypothetical protein
Cc006921	hypothetical protein
Cc006923	hypothetical protein
Cc006939	hypothetical protein
Cc006940	hypothetical protein
Cc006949	hypothetical protein
Cc006950	hypothetical protein
Cc006960	Environmental stimuli response.temperature.Hsp (heat-shock-responsive protein) families.sHsp (small heat-shock-responsive protein) families.class-C-II protein
Cc006961	Environmental stimuli response.temperature.Hsp (heat-shock-responsive protein) families.sHsp (small heat-shock-responsive protein) families.class-C-II protein
Cc006962	Environmental stimuli response.temperature.Hsp (heat-shock-responsive protein) families.sHsp (small heat-shock-responsive protein) families.class-C-II protein
Cc006968	hypothetical protein
Cc006971	hypothetical protein
Cc006979	hypothetical protein
Cc006989	RNA biosynthesis.transcription factor families.AP2/ERF superfamily.ERF-type transcription factor
Cc006991	Cell cycle.mitosis and meiosis.meiotic recombination.meiotic initiation.ASY1 homolog pairing factor
Cc006992	hypothetical protein
Cc006994	Protein modification.phosphorylation.TKL kinase superfamily.MAP3K-RAF kinase
Cc006995	hypothetical protein
Cc007006	Protein degradation.peptide tagging.Ubiquitin (UBQ)-anchor addition (ubiquitylation).UBQ-ligase E3 activities.RING-domain E3 ligase activities.RING-HCa-type E3 ligase
Cc007008	hypothetical protein
Cc007013	hypothetical protein
Cc007016	hypothetical protein
Cc007021	hypothetical protein
Cc007022	hypothetical protein
Cc007023	hypothetical protein
Cc007024	Cell cycle.cytokinesis.phragmoplast disassembly.Katanin ATP-dependent microtubule severing complex.regulatory component
Cc007028	Chromatin assembly and remodeling.chromatin remodeling complexes.ATPase core components.Rad5/16-like group.Rad5/16 chromatin remodeling factor
Cc007030	Protein degradation.peptidase families.serine-type peptidase activities.serine carboxypeptidase
Cc007031	Protein degradation.peptidase families.serine-type peptidase activities.serine carboxypeptidase
Cc007032	hypothetical protein
Cc007034	hypothetical protein
Cc007035	Lipid metabolism.sphingolipid metabolism.sphingosine kinase
Cc007036	hypothetical protein
Cc007037	Lipid metabolism.sphingolipid metabolism.sphingosine kinase
Cc007038	hypothetical protein
Cc007041	hypothetical protein
Cc007044	hypothetical protein
Cc007047	hypothetical protein
Cc007048	Phytohormones.auxin.perception and signal transduction.receptor complex.TIR1/AFB-type component
Cc007049	Solute transport.carrier-mediated transport.MFS superfamily.SP family.monosaccharide transporter (STP-type)
Cc007050	RNA biosynthesis.transcription factor families.MYB superfamily.MYB transcription factor
Cc007054	Solute transport.carrier-mediated transport.ENT nucleoside transporter
Cc007055	hypothetical protein
Cc007057	hypothetical protein
Cc007065	hypothetical protein
Cc007066	Cell wall.pectin.homogalacturonan.modification and degradation.pectin methylesterase
Cc007069	Cell wall.pectin.homogalacturonan.modification and degradation.pectin methylesterase
Cc007072	hypothetical protein
Cc007073	Cell wall.lignin.monolignol glycosylation and deglycosylation.coniferin beta-glucosidase
Cc007084	hypothetical protein
Cc007085	hypothetical protein
Cc007086	hypothetical protein
Cc007089	hypothetical protein
Cc007090	hypothetical protein
Cc007093	hypothetical protein
Cc007094	Protein degradation.peptidase families.aspartic-type peptidase activities.pepsin-type protease
Cc007095	Cell wall.pectin.modification and degradation.pectate lyase
Cc007096	Chromatin assembly and remodeling.histone modifications.histone lysine methylation/demethylation.JmjC group histone demethylase activities.KDM3-type histone demethylase
Cc007097	hypothetical protein
Cc007109	hypothetical protein
Cc007115	Phytohormones.ethylene.synthesis.1-aminocyclopropane-1-carboxylate (ACC) oxidase
Cc007122	hypothetical protein
Cc007124	Solute transport.carrier-mediated transport.MFS superfamily.NRT1/PTR anion transporter
Cc007132	hypothetical protein
Cc007137	Phytohormones.brassinosteroid.perception and signal transduction.GSK3-type protein kinase (BIN2)
Cc007143	hypothetical protein
Cc007145	hypothetical protein
Cc007146	hypothetical protein
Cc007152	RNA biosynthesis.transcription factor families.TCP transcription factor
Cc007154	Cell wall.cellulose.synthesis.cellulose microfibrils and hemicellulose interaction.COB-type protein
Cc007155	RNA biosynthesis.transcription factor families.bZIP superfamily.bZIP transcription factor
Cc007162	hypothetical protein
Cc007164	hypothetical protein
Cc007166	Solute transport.carrier-mediated transport.CPA superfamily.CPA-2 family.proton:monovalent cation antiporter (CHX-type)
Cc007171	hypothetical protein
Cc007184	hypothetical protein
Cc007185	hypothetical protein
Cc007188	hypothetical protein
Cc007191	hypothetical protein
Cc007192	hypothetical protein
Cc007200	hypothetical protein
Cc007234	Protein degradation.peptide tagging.Ubiquitin (UBQ)-anchor addition (ubiquitylation).UBQ-ligase E3 activities.RING-domain E3 ligase activities.RING-H2-type E3 ligase
Cc007248	hypothetical protein
Cc007249	hypothetical protein
Cc007252	hypothetical protein
Cc007253	hypothetical protein
Cc007257	hypothetical protein
Cc007261	hypothetical protein
Cc007271	hypothetical protein
Cc007275	RNA biosynthesis.transcription factor families.HB (Homeobox) superfamily.KNOX transcription factor
Cc007281	RNA biosynthesis.transcription factor families.FAR1 transcription factor
Cc007282	Protein modification.phosphorylation.TKL kinase superfamily.DUF26 kinase
Cc007284	hypothetical protein
Cc007287	hypothetical protein
Cc007305	Coenzyme metabolism.iron-sulfur cluster assembly machineries.plastidial SUF system.assembly phase.SUF-E2/-E3 component
Cc007306	hypothetical protein
Cc007321	hypothetical protein
Cc007328	hypothetical protein
Cc007338	hypothetical protein
Cc007347	hypothetical protein
Cc007350	hypothetical protein
Cc007351	Protein modification.dephosphorylation.serine/threonine protein phosphatase superfamily.PPP Fe-Zn-dependent phosphatase families.PP2A phosphatase complexes.B1-type regulatory component
Cc007419	hypothetical protein
Cc007420	hypothetical protein
Cc007421	hypothetical protein
Cc007451	RNA biosynthesis.transcription factor families.FAR1 transcription factor
Cc007454	hypothetical protein
Cc007476	hypothetical protein
Cc007486	hypothetical protein
Cc007506	hypothetical protein
Cc007538	Environmental stimuli response.programmed cell death (PCD).GILP regulator protein
Cc007539	hypothetical protein
Cc007540	RNA biosynthesis.transcription factor families.NAC transcription factor
Cc007541	Solute transport.carrier-mediated transport.TOC superfamily.SWEET sugar efflux transporter
Cc007542	Membrane vesicle trafficking.target membrane tethering.Exocyst complex.EXO70 component
Cc007543	hypothetical protein
Cc007544	hypothetical protein
Cc007545	Membrane vesicle trafficking.target membrane tethering.Exocyst complex.EXO70 component
Cc007549	hypothetical protein
Cc007550	Lipid metabolism.sphingolipid metabolism.sphingosine-1-phosphate lyase
Cc007552	RNA biosynthesis.transcription factor families.MADS box transcription factor
Cc007560	hypothetical protein
Cc007569	hypothetical protein
Cc007570	RNA biosynthesis.organelle machineries.transcription.mTERF transcription factor
Cc007572	hypothetical protein
Cc007587	hypothetical protein
Cc007590	hypothetical protein
Cc007600	Protein modification.phosphorylation.TKL kinase superfamily.MAP3K-RAF kinase
Cc007601	hypothetical protein
Cc007625	hypothetical protein
Cc007626	hypothetical protein
Cc007634	hypothetical protein
Cc007635	Solute transport.carrier-mediated transport.APC superfamily.AAAP family.AAAP-type transporter
Cc007639	hypothetical protein
Cc007651	hypothetical protein
Cc007652	hypothetical protein
Cc007654	hypothetical protein
Cc007665	Phytohormones.jasmonic acid.perception and signal transduction.receptor complex.COI-type component
Cc007666	hypothetical protein
Cc007671	Solute transport.carrier-mediated transport.APC superfamily.AAAP family.proline transporter (ProT-type)
Cc007675	hypothetical protein
Cc007676	Environmental stimuli response.temperature.Hsp (heat-shock-responsive protein) families.sHsp (small heat-shock-responsive protein) families.class-C-I protein
Cc007677	hypothetical protein
Cc007678	Environmental stimuli response.temperature.Hsp (heat-shock-responsive protein) families.sHsp (small heat-shock-responsive protein) families.class-C-I protein
Cc007679	hypothetical protein
Cc007680	RNA biosynthesis.transcription factor families.DBP transcription factor
Cc007685	hypothetical protein
Cc007689	hypothetical protein
Cc007695	RNA biosynthesis.transcription factor families.MYB superfamily.MYB-related transcription factor
Cc007696	hypothetical protein
Cc007698	hypothetical protein
Cc007700	hypothetical protein
Cc007707	Environmental stimuli response.temperature.Hsp (heat-shock-responsive protein) families.Hsp70 family.DnaK protein
Cc007714	hypothetical protein
Cc007716	hypothetical protein
Cc007726	Solute transport.carrier-mediated transport.APC superfamily.SulP family.sulfate transporter (SULTR-type)
Cc007739	hypothetical protein
Cc007742	hypothetical protein
Cc007744	hypothetical protein
Cc007748	hypothetical protein
Cc007766	RNA biosynthesis.transcription factor families.C2C2 superfamily.BBX/CONSTANS transcription factor
Cc007772	hypothetical protein
Cc007773	hypothetical protein
Cc007774	hypothetical protein
Cc007776	hypothetical protein
Cc007780	hypothetical protein
Cc007783	hypothetical protein
Cc007786	Protein degradation.peptide tagging.Ubiquitin (UBQ)-anchor addition (ubiquitylation).UBQ-ligase E3 activities.RING-domain E3 ligase activities.RING-v-type E3 ligase
Cc007795	Protein modification.dephosphorylation.serine/threonine protein phosphatase superfamily.PPM/PP2C Mn/Mg-dependent phosphatase families.clade C phosphatase
Cc007797	RNA biosynthesis.transcription factor families.MYB superfamily.MYB transcription factor
Cc007804	hypothetical protein
Cc007807	Solute transport.carrier-mediated transport.APC superfamily.AAAP family.AAAP-type transporter
Cc007808	hypothetical protein
Cc007809	Protein modification.phosphorylation.TKL kinase superfamily.L-lectin kinase
Cc007810	hypothetical protein
Cc007811	RNA biosynthesis.transcription factor families.C2H2 zinc finger transcription factor
Cc007817	hypothetical protein
Cc007820	Lipid metabolism.sphingolipid metabolism.inositol phosphorylceramide synthase
Cc007822	hypothetical protein
Cc007823	hypothetical protein
Cc007824	RNA processing.RNA 5-end cap adding.RNA capping enzyme
Cc007825	Solute transport.carrier-mediated transport.MFS superfamily.PHT4 phosphate transporter
Cc007833	Solute transport.carrier-mediated transport.APC superfamily.AAAP family.auxin transporter (AUX/LAX-type)
Cc007834	hypothetical protein
Cc007836	hypothetical protein
Cc007837	hypothetical protein
Cc007841	Solute transport.carrier-mediated transport.CDF superfamily.CaCA family.cation antiporter (CAX-type)
Cc007846	RNA biosynthesis.transcription factor families.Alfin-like transcription factor
Cc007847	hypothetical protein
Cc007854	hypothetical protein
Cc007860	Carbohydrate metabolism.fermentation.alcoholic fermentation.pyruvate decarboxylase
Cc007863	Phytohormones.ethylene.synthesis.ETO-type regulator protein
Cc007871	Solute transport.carrier-mediated transport.APC superfamily.AAAP family.AAAP-type transporter
Cc007872	Secondary metabolism.phenolics.p-coumaroyl-CoA synthesis.phenylalanine ammonia lyase
Cc007875	hypothetical protein
Cc007877	hypothetical protein
Cc007885	Membrane vesicle trafficking.endomembrane trafficking.protein recycling.ubiquitylated cargo adaptors.TOM associated protein
Cc007889	hypothetical protein
Cc007890	Protein modification.phosphorylation.CAMK kinase superfamily.SNF1-related SnRK3 kinase
Cc007891	hypothetical protein
Cc007902	Protein modification.phosphorylation.AGC kinase superfamily.AGC-VI/PKA kinase
Cc007903	,Cell wall.hemicellulose.heteromannan.modification and degradation.endo-beta-1,4-mannanase
Cc007904	Protein modification.phosphorylation.TKL kinase superfamily.CrlRLK1 kinase
Cc007910	hypothetical protein
Cc007912	hypothetical protein
Cc007914	Protein biosynthesis.translation elongation.eEF1A aminoacyl-tRNA binding factor
Cc007916	hypothetical protein
Cc007926	hypothetical protein
Cc007927	hypothetical protein
Cc007928	hypothetical protein
Cc007934	hypothetical protein
Cc007938	hypothetical protein
Cc007943	hypothetical protein
Cc007944	hypothetical protein
Cc007949	RNA processing.mRNA decay.mRNA deadenylation.CCR4-NOT complex.NOT3/5 component
Cc007952	Redox homeostasis.hydrogen peroxide removal.thioredoxin families.ACHT atypical thioredoxin
Cc007973	Solute transport.channel-mediated transport.channels.MIP family.small basic intrinsic protein (SIP-type)
Cc007988	hypothetical protein
Cc007994	Cell wall.lignin.monolignol synthesis.coumarate 3-hydroxylase (C3H)
Cc008000	RNA biosynthesis.transcription factor families.bZIP superfamily.bZIP transcription factor
Cc008008	RNA biosynthesis.RNA polymerase II-dependent transcription.MEDIATOR transcription co-activator complex.other.MED26 component
Cc008009	hypothetical protein
Cc008013	RNA biosynthesis.transcription factor families.bZIP superfamily.bZIP transcription factor
Cc008014	Cell cycle.interphase.G1 phase.DP transcription factor
Cc008016	Solute transport.carrier-mediated transport.APC superfamily.AAAP family.AAAP-type transporter
Cc008020	hypothetical protein
Cc008027	Phytohormones.cytokinin.conjugation and degradation.UDP-dependent glycosyl transferase
Cc008029	hypothetical protein
Cc008031	hypothetical protein
Cc008032	Lipid metabolism.lipid degradation.triacylglycerol lipase activities.diacyl-/triacylglycerol lipase activities.Patatin-type triacylglycerol lipase
Cc008034	hypothetical protein
Cc008035	hypothetical protein
Cc008038	Solute transport.primary active transport.P-type ATPase superfamily.P2 family.ACA P2B-type calcium cation-transporting ATPase
Cc008040	hypothetical protein
Cc008041	hypothetical protein
Cc008043	Phytohormones.cytokinin.conjugation and degradation.UDP-dependent glycosyl transferase
Cc008062	Solute transport.channel-mediated transport.channels.MSL mechanosensitive ion channel
Cc008065	Protein modification.phosphorylation.CAMK kinase superfamily.CDPK kinase
Cc008066	hypothetical protein
Cc008067	RNA biosynthesis.transcription factor families.C3H zinc finger transcription factor
Cc008076	hypothetical protein
Cc008085	Phytohormones.strigolactone.perception and signal transduction.SMXL signal transducer
Cc008086	hypothetical protein
Cc008091	hypothetical protein
Cc008096	hypothetical protein
Cc008101	hypothetical protein
Cc008106	hypothetical protein
Cc008109	Carbohydrate metabolism.starch metabolism.degradation.hydrolysis and phosphorolysis.plastidial alpha-glucan phosphorylase
Cc008112	Protein modification.phosphorylation.TKL kinase superfamily.RLCK-VII kinase families.RLCK-VIIa kinase
Cc008123	RNA biosynthesis.transcription factor families.GRAS transcription factor
Cc008124	RNA biosynthesis.transcription factor families.GRAS transcription factor
Cc008125	RNA biosynthesis.transcription factor families.GRAS transcription factor
Cc008128	RNA biosynthesis.transcription factor families.GRAS transcription factor
Cc008148	hypothetical protein
Cc008153	Chromatin assembly and remodeling.DNA methylation.ROS1-mediated DNA demethylation.MBD7 ROS1-recruitment complex.MBD7 component
Cc008155	hypothetical protein
Cc008156	hypothetical protein
Cc008164	hypothetical protein
Cc008165	Solute transport.carrier-mediated transport.MFS superfamily.PHT4 phosphate transporter
Cc008166	hypothetical protein
Cc008167	Protein degradation.peptide tagging.Ubiquitin (UBQ)-anchor addition (ubiquitylation).UBQ-ligase E3 activities.RING-domain E3 ligase activities.RING-H2-type E3 ligase
Cc008169	hypothetical protein
Cc008170	hypothetical protein
Cc008175	Protein modification.phosphorylation.TKL kinase superfamily.CrlRLK1 kinase
Cc008183	Solute transport.primary active transport.P-type ATPase superfamily.P2 family.ECA P2A-type calcium cation-transporting ATPase
Cc008184	RNA processing.ribonuclease activities.RNase P ribonuclease activities.RNA-dependent RNase P complex.RPP30 component
Cc008185	hypothetical protein
Cc008187	hypothetical protein
Cc008198	Solute transport.carrier-mediated transport.MOP superfamily.MATE family.metabolite transporter (DTX-type)
Cc008201	RNA biosynthesis.transcription factor families.AS2/LOB transcription factor
Cc008203	hypothetical protein
Cc008206	hypothetical protein
Cc008209	Protein degradation.peptide tagging.Small-Ubiquitin-like-Modifier (SUMO)-anchor modification (sumoylation).SUMO E3 ligase activities.SUMO E3 ligase (SIZ1)
Cc008221	Protein degradation.peptide tagging.Homologous-to-Ubiquitin (HUB)-anchor addition.HUB ubiquitin-fold protein
Cc008222	RNA biosynthesis.transcription factor families.C2C2 superfamily.GATA transcription factor
Cc008224	Protein degradation.peptide tagging.Homologous-to-Ubiquitin (HUB)-anchor addition.HUB ubiquitin-fold protein
Cc008225	RNA biosynthesis.transcription factor families.C2C2 superfamily.GATA transcription factor
Cc008226	hypothetical protein
Cc008239	hypothetical protein
Cc008240	hypothetical protein
Cc008246	hypothetical protein
Cc008252	Membrane vesicle trafficking.SNARE target membrane recognition and fusion complexes.Qa-type SNARE components.SYP1-group protein
Cc008265	hypothetical protein
Cc008268	hypothetical protein
Cc008280	hypothetical protein
Cc008282	hypothetical protein
Cc008293	hypothetical protein
Cc008295	hypothetical protein
Cc008302	Phytohormones.cytokinin.perception and signal transduction.A-type ARR response negative regulator
Cc008310	Protein modification.phosphorylation.CAMK kinase superfamily.CRK kinase
Cc008311	RNA biosynthesis.transcription factor families.bHLH transcription factor
Cc008314	RNA biosynthesis.RNA polymerase II-dependent transcription.MEDIATOR transcription co-activator complex.other.MED26 component
Cc008328	hypothetical protein
Cc008329	Chromatin assembly and remodeling.histone modifications.histone lysine methylation/demethylation.class V/Su(var) histone methyltransferase component
Cc008335	hypothetical protein
Cc008342	Cytoskeleton.microfilament network.actin polymerisation.cofilin-like actin depolymerizing factor
Cc008347	RNA biosynthesis.transcription factor families.MYB superfamily.MYB transcription factor
Cc008355	hypothetical protein
Cc008381	Protein degradation.peptide tagging.Ubiquitin (UBQ)-anchor addition (ubiquitylation).UBQ-ligase E3 activities.RING-domain E3 ligase activities.RING-v-type E3 ligase
Cc008382	hypothetical protein
Cc008384	Protein degradation.peptide tagging.Ubiquitin (UBQ)-anchor addition (ubiquitylation).UBQ-ligase E3 activities.RING-domain E3 ligase activities.RING-H2-type E3 ligase
Cc008389	Cell wall.cell wall proteins.expansins.alpha-type expansin
Cc008390	RNA biosynthesis.transcription factor families.NAC transcription factor
Cc008392	Protein modification.phosphorylation.TKL kinase superfamily.MAP3K-RAF kinase
Cc008393	hypothetical protein
Cc008397	hypothetical protein
Cc008403	RNA biosynthesis.transcription factor families.WRKY transcription factor
Cc008417	hypothetical protein
Cc008422	Carbohydrate metabolism.starch metabolism.degradation.hydrolysis and phosphorolysis.amylase activities.beta amylase
Cc008435	Protein modification.phosphorylation.TKL kinase superfamily.CrlRLK1 kinase
Cc008439	hypothetical protein
Cc008447	Solute transport.primary active transport.ABC superfamily.ABC2 family.subfamily ABCG transporter
Cc008448	Phytohormones.abscisic acid.transport.ABCG-type abscisic acid transporter
Cc008452	Solute transport.primary active transport.ABC superfamily.ABC2 family.subfamily ABCG transporter
Cc008455	hypothetical protein
Cc008464	Protein degradation.peptidase families.aspartic-type peptidase activities.pepsin-type protease
Cc008467	hypothetical protein
Cc008472	hypothetical protein
Cc008500	RNA biosynthesis.transcription factor families.FAR1 transcription factor
Cc008501	Carbohydrate metabolism.sucrose metabolism.degradation.fructose kinase
Cc008515	Solute transport.carrier-mediated transport.APC superfamily.AAAP family.AAAP-type transporter
Cc008516	hypothetical protein
Cc008517	hypothetical protein
Cc008520	Lipid metabolism.lipid degradation.metabolic fate of glycerol.FAD-dependent glycerol-3-phosphate dehydrogenase
Cc008534	Cell wall.pectin.modification and degradation.pectate lyase
Cc008536	hypothetical protein
Cc008537	RNA biosynthesis.transcription factor families.NAC transcription factor
Cc008538	RNA biosynthesis.transcription factor families.NAC transcription factor
Cc008540	hypothetical protein
Cc008543	hypothetical protein
Cc008544	hypothetical protein
Cc008548	hypothetical protein
Cc008550	Multi-process regulatory mechanisms.SnRK1 metabolic regulator system.FLZ SnRK1-interacting factor
Cc008551	Secondary metabolism.terpenoids.terpenoid synthesis.mono-/sesquiterpene-/diterpene synthase
Cc008552	Secondary metabolism.terpenoids.terpenoid synthesis.mono-/sesquiterpene-/diterpene synthase
Cc008562	Redox homeostasis.reactive oxygen generation.Rboh NADPH-oxidase
Cc008571	hypothetical protein
Cc008573	Cell wall.pectin.homogalacturonan.modification and degradation.pectin methylesterase
Cc008576	hypothetical protein
Cc008579	Protein modification.N-linked glycosylation.complex N-glycan maturation.class-I alpha-mannosidase I
Cc008586	hypothetical protein
Cc008587	Solute transport.carrier-mediated transport.MC-type solute transporter
Cc008601	Membrane vesicle trafficking.Coat protein I (COPI) coatomer machinery.ARF-GTPase guanyl-nucleotide exchange factor (ARF-GEF) activities.BIG-type ARF-GEF factor
Cc008604	hypothetical protein
Cc008606	Cell wall.pectin.homogalacturonan.modification and degradation.pectin methylesterase
Cc008607	Cell wall.pectin.homogalacturonan.modification and degradation.pectin methylesterase
Cc008609	hypothetical protein
Cc008614	hypothetical protein
Cc008615	Lipid metabolism.lipid transport.phospholipid transverse translocation.ALA-ALIS flippase complex.ALA active component
Cc008616	Redox homeostasis.reactive oxygen generation.Rboh NADPH-oxidase
Cc008625	hypothetical protein
Cc008626	hypothetical protein
Cc008627	hypothetical protein
Cc008628	Multi-process regulatory mechanisms.SnRK1 metabolic regulator system.FLZ SnRK1-interacting factor
Cc008636	hypothetical protein
Cc008638	hypothetical protein
Cc008640	RNA biosynthesis.transcription factor families.NAC transcription factor
Cc008641	RNA biosynthesis.transcription factor families.NAC transcription factor
Cc008644	Cell wall.pectin.modification and degradation.pectate lyase
Cc008654	hypothetical protein
Cc008659	Lipid metabolism.lipid degradation.metabolic fate of glycerol.FAD-dependent glycerol-3-phosphate dehydrogenase
Cc008666	hypothetical protein
Cc008674	Secondary metabolism.phenolics.p-coumaroyl-CoA synthesis.phenylalanine ammonia lyase
Cc008676	hypothetical protein
Cc008680	hypothetical protein
Cc008686	Lipid metabolism.lipid degradation.phospholipase activities.phospholipase A2 activities.pPLA2-III-type phospholipase A2
Cc008694	RNA biosynthesis.transcription factor families.AS2/LOB transcription factor
Cc008695	hypothetical protein
Cc008702	Cell wall.cutin and suberin.cutin polyester synthesis.CD-type cutin synthase
Cc008708	hypothetical protein
Cc008710	Lipid metabolism.phytosterols.phytosterol conjugation.phytosterol glycosylation.UDP-glucose:sterol glucosyltransferase
Cc008720	Protein modification.dephosphorylation.serine/threonine protein phosphatase superfamily.PPM/PP2C Mn/Mg-dependent phosphatase families.clade E phosphatase
Cc008729	RNA biosynthesis.transcription factor families.C3H zinc finger transcription factor
Cc008744	hypothetical protein
Cc008745	hypothetical protein
Cc008746	Lipid metabolism.glycerolipid synthesis.phosphatidylcholine.CDP-choline pathway.CTP:phosphorylcholine cytidylyltransferase
Cc008747	Cell wall.pectin.homogalacturonan.modification and degradation.pectin methylesterase
Cc008748	hypothetical protein
Cc008750	hypothetical protein
Cc008751	Cell wall.nucleotide sugars.sugar nucleotide oxidation pathway (SNOP).UDP-D-xylose 4-epimerase
Cc008755	hypothetical protein
Cc008759	hypothetical protein
Cc008764	RNA biosynthesis.transcription factor families.MYB superfamily.G2-like GARP transcription factor
Cc008772	hypothetical protein
Cc008781	hypothetical protein
Cc008783	hypothetical protein
Cc008784	hypothetical protein
Cc008785	hypothetical protein
Cc008787	hypothetical protein
Cc008794	Lipid metabolism.lipid degradation.fatty acid degradation.core beta-oxidation.ACX acyl CoA oxidase
Cc008802	Protein modification.dephosphorylation.serine/threonine protein phosphatase superfamily.PPM/PP2C Mn/Mg-dependent phosphatase families.clade F phosphatase
Cc008803	Chromatin assembly and remodeling.chromatin remodeling complexes.ATPase core components.SSO1653-like group.ERCC6 chromatin remodeling factor
Cc008806	hypothetical protein
Cc008807	hypothetical protein
Cc008808	hypothetical protein
Cc008809	hypothetical protein
Cc008813	RNA biosynthesis.transcription factor families.C3H zinc finger transcription factor
Cc008821	hypothetical protein
Cc008824	Solute transport.carrier-mediated transport.TOC superfamily.SWEET sugar efflux transporter
Cc008825	hypothetical protein
Cc008846	hypothetical protein
Cc008847	hypothetical protein
Cc008855	hypothetical protein
Cc008856	hypothetical protein
Cc008862	hypothetical protein
Cc008867	hypothetical protein
Cc008869	hypothetical protein
Cc008879	hypothetical protein
Cc008886	Protein modification.phosphorylation.TKL kinase superfamily.PERK kinase
Cc008894	hypothetical protein
Cc008895	hypothetical protein
Cc008897	RNA biosynthesis.transcription factor families.bHLH transcription factor
Cc008898	RNA biosynthesis.transcription factor families.AP2/ERF superfamily.DREB-type transcription factor
Cc008901	RNA biosynthesis.transcription factor families.HB (Homeobox) superfamily.HD-ZIP III transcription factor
Cc008904	hypothetical protein
Cc008908	Carbohydrate metabolism.sucrose metabolism.degradation.hexokinase
Cc008918	hypothetical protein
Cc008919	hypothetical protein
Cc008921	Protein degradation.peptide tagging.Ubiquitin (UBQ)-anchor addition (ubiquitylation).UBQ-ligase E3 activities.RING-domain E3 ligase activities.RING-HCa-type E3 ligase
Cc008923	hypothetical protein
Cc008936	hypothetical protein
Cc008956	Solute transport.carrier-mediated transport.MFS superfamily.NRT1/PTR anion transporter
Cc008968	hypothetical protein
Cc008969	RNA processing.organelle machineries.RNA splicing.plastidial RNA splicing.group-II intron splicing.ISE2 RNA helicase
Cc008970	RNA processing.organelle machineries.RNA splicing.plastidial RNA splicing.group-II intron splicing.ISE2 RNA helicase
Cc008971	hypothetical protein
Cc008976	Protein degradation.peptidase families.metallopeptidase activities.Matrixin-type metalloprotease
Cc008981	Cell wall.sporopollenin.synthesis.medium-chain fatty acid hydroxylase
Cc008984	hypothetical protein
Cc008994	hypothetical protein
Cc008996	hypothetical protein
Cc008997	Solute transport.carrier-mediated transport.APC superfamily.HAK/KUP/KT potassium cation transporter
Cc008998	Polyamine metabolism.spermidine/spermine.synthesis.spermidine synthase
Cc009000	hypothetical protein
Cc009004	hypothetical protein
Cc009006	Cell wall.pectin.modification and degradation.polygalacturonase activities.non-catalytic polygalacturonase regulator
Cc009007	hypothetical protein
Cc009011	hypothetical protein
Cc009012	hypothetical protein
Cc009013	hypothetical protein
Cc009024	hypothetical protein
Cc009025	hypothetical protein
Cc009026	Lipid metabolism.fatty acid synthesis.citrate shuttle.ATP-dependent citrate lyase complex.alpha chain
Cc009028	Secondary metabolism.phenolics.regulation of key enzymes.KFB-CHS proteolytic chalcone synthase regulator
Cc009030	hypothetical protein
Cc009037	Phytohormones.auxin.synthesis.indole-3-pyruvic acid (IPyA) pathway.tryptophan aminotransferase
Cc009050	RNA biosynthesis.transcription factor families.AP2/ERF superfamily.ERF-type transcription factor
Cc009060	hypothetical protein
Cc009071	hypothetical protein
Cc009072	hypothetical protein
Cc009077	Protein degradation.peptide tagging.Ubiquitin (UBQ)-anchor addition (ubiquitylation).UBQ-ligase E3 activities.RING-domain E3 ligase activities.RING-HCa-type E3 ligase
Cc009080	Protein modification.phosphorylation.TKL kinase superfamily.LRR-I kinase
Cc009082	hypothetical protein
Cc009096	hypothetical protein
Cc009106	Protein degradation.peptidase families.metallopeptidase activities.carboxypeptidase activities.M28 carboxypeptidase
Cc009113	Carbohydrate metabolism.sucrose metabolism.synthesis.cytosolic phosphoglucose isomerase
Cc009114	hypothetical protein
Cc009121	hypothetical protein
Cc009134	RNA biosynthesis.transcription factor families.HB (Homeobox) superfamily.KNOX transcription factor
Cc009136	Solute transport.carrier-mediated transport.DMT superfamily.NST-TPT group.UTR1/5 nucleotide sugar transporter
Cc009151	Protein degradation.peptide tagging.Ubiquitin (UBQ)-anchor addition (ubiquitylation).UBQ-ligase E3 activities.Cullin-based ubiquitylation complexes.SKP1-CUL1-FBX (SCF) E3 ligase complexes.F-BOX substrate adaptor components.FBX component
Cc009153	hypothetical protein
Cc009154	Coenzyme metabolism.iron-sulfur cluster assembly machineries.cytosolic CIA system.transfer phase.CIA2/AE7 component
Cc009166	hypothetical protein
Cc009178	Phytohormones.brassinosteroid.synthesis.3-epi-6-deoxocathasterone 23-monooxygenase
Cc009180	Cell wall.pectin.rhamnogalacturonan I.modification and degradation.beta-galactosidase
Cc009192	hypothetical protein
Cc009193	hypothetical protein
Cc009194	hypothetical protein
Cc009196	hypothetical protein
Cc009198	Protein modification.phosphorylation.TKL kinase superfamily.LRR-VII kinase
Cc009201	hypothetical protein
Cc009202	hypothetical protein
Cc009209	Protein degradation.peptidase families.serine-type peptidase activities.subtilisin-type protease families.SBT1 protease
Cc009223	Protein degradation.peptidase families.aspartic-type peptidase activities.pepsin-type protease
Cc009229	hypothetical protein
Cc009230	hypothetical protein
Cc009231	Amino acid metabolism.biosynthesis.serine family.cysteine.serine O-acetyltransferase
Cc009239	hypothetical protein
Cc009251	hypothetical protein
Cc009252	Chromatin assembly and remodeling.histones.H3-type histone
Cc009253	Protein degradation.peptide tagging.Ubiquitin (UBQ)-anchor addition (ubiquitylation).UBQ-ligase E3 activities.RING-domain E3 ligase activities.RING-H2-type E3 ligase
Cc009254	Secondary metabolism.terpenoids.mevalonate pathway.3-hydroxy-3-methylglutaryl-CoA reductase
Cc009256	hypothetical protein
Cc009258	Phytohormones.auxin.conjugation and degradation.indole-3-acetic acid dioxygenase
Cc009260	hypothetical protein
Cc009261	hypothetical protein
Cc009262	Solute transport.carrier-mediated transport.OPT family.iron chelator transporter (YSL-type)
Cc009266	hypothetical protein
[truncated: 6,614 more rows]
